# Supplementary material
Source: PubMed Central journal article supplement (PMC4299209)
Supplement: pnas.1417685112.sapp.pdf [file pnas.1417685112.sapp.pdf]

**Corresponding authors:**

Ralf Heermann  
Ludwig-Maximilians-Universität München  
Biozentrum, Bereich Mikrobiologie  
Großhaderner Str. 2-4  
82152 Martinsried/München  
GERMANY

Fon: +49 (89) 2180-74506  
Fax: +49 (89) 2180-74520  
E-Mail: [heermann@lmu.de](mailto:heermann@lmu.de)

Helge B. Bode  
Goethe-Universität Frankfurt  
Merck Stiftungsprofessur für Molekulare  
Biotechnologie  
Fachbereich Biowissenschaften  
Max-von-Laue-Str. 9  
60438 Frankfurt am Main  
GERMANY

Fon: +49 (69) 798-29557  
Fax: +49 (69) 798-29527  
E-Mail: [h.bode@bio.uni-frankfurt.de](mailto:h.bode@bio.uni-frankfurt.de)

# Dialkylresorcinols as bacterial signaling molecules

## *Supplementary Information Appendix*

*Sophie Brameyer<sup>1+</sup>, Darko Kresovic<sup>2+</sup>, Helge B. Bode<sup>2,3</sup>, and Ralf Heermann<sup>2</sup>*

<sup>1</sup>*Ludwig-Maximilians-Universität München, Biozentrum, Bereich Mikrobiologie, Großhaderner Str. 2-4, 82152 Martinsried/München, Germany*

<sup>2</sup>*Goethe-Universität Frankfurt, Merck Stiftungsprofessur für Molekulare Biotechnologie, Fachbereich Biowissenschaften, Max-von-Laue-Str. 9, 60438 Frankfurt am Main, Germany*

<sup>3</sup>*Buchmann Institut für Molekulare Lebenswissenschaften (BMLS), Goethe-Universität Frankfurt, 60438 Frankfurt am Main, Germany*

<sup>+</sup>*both authors contributed equally to this work*

### **BIOLOGICAL SCIENCES – Microbiology**

Keywords: quorum sensing, cell-cell communication, LuxR solos, entomo- and human-pathogenic bacteria, *Photorhabdus*

## SUPPLEMENTARY NOTE

### Bacterial strains and plasmids

All strains used in this study are listed in SI Appendix, Table S1, the plasmids in SI Appendix, Table S2, and oligonucleotides in SI Appendix Table S3. *E. coli* strains were grown aerobically at 37°C in LB medium [10% (w/v) peptone, 5% (w/v) yeast extract, 10% (w/v) NaCl] or M63 minimal medium (1), whereas *P. asymbiotica* strains were grown aerobically at 37°C in Casein-Soya-Peptone (CASO) medium [10% (w/v) peptone of casein, 5% (w/v) peptone of soy flour, 5% (w/v) NaCl]. For preparation of solid media, 1.5% (w/v) agar was added. CASO agar was supplemented with 0.1% (w/v) pyruvate. Antibiotics were added for selection in the following concentration: ampicillin (100 µg ml<sup>-1</sup>), carbenicillin (100 µg ml<sup>-1</sup>), kanamycin (50 µg ml<sup>-1</sup>), chloramphenicol (17 µg ml<sup>-1</sup>), gentamicin (20 µg ml<sup>-1</sup>), and streptomycin (20 µg ml<sup>-1</sup>). Media were supplemented with 50 µg ml<sup>-1</sup> aminolevulinic acid for growth of *E. coli* ST18. For production of DARs strain *Photorhabdus asymbiotica* PB68.1 was used. *E. coli* ST18 (SI Appendix, Table S1) was used as donor strain for conjugation of plasmid pMRS3-1-*pauR*-AB (this study) into *P. asymbiotica* PB68.1. Plasmid pUC19-Kan (Dr. Heinrich Jung, LMU München, lab collection) was used for cloning the 600 bp homology arms of the *P. asymbiotica pauR* gene, up- and downstream of a kanamycin resistance cassette to generate a *pauR* knockout in *P. asymbiotica*. For transfer into *P. asymbiotica*, this kanamycin-cassette surrounded by the *pauR*-homology arms was later brought into conjugation suicide plasmid pMRS101 (2) resulting in plasmid pMRS3-1-*pauR*-AB (see detailed description below). Plasmid pBAD-Cherry/*pcfA* (this study) was used as reporter plasmid to analyze *P<sub>pcfA</sub>* activity.

### Construction of plasmids

For construction of the conjugation plasmid pMRS3-1-*pauR*-AB, a kanamycin cassette flanked by 600 bp homology arms representing the *pauR* up- (A-site) and downstream area (B-site) was generated. The homology arms were amplified by PCR with Phusion© polymerase (New England Biolabs, Frankfurt) using genomic DNA of *P. asymbiotica* as template and primers PauR\_FA\_SacI\_fwd and PauR\_FA\_XmaI\_rev, and PauR\_FB\_Sall\_fwd and PauR\_FB\_HindIII\_rev, respectively. The A-site was then cloned upstream of the kanamycin cassette in

plasmid pUC19-Kan using restriction sites *SacI* and *XmaI* resulting in plasmid pUC-Kan-*pauR*-FA, then the B-site was cloned into plasmid pUC-Kan-*pauR*-FA using restriction sites *SallI* and *HindIII* resulting in plasmid pUC-Kan-*pauR*-AB. Then, the complete kanamycin cassette flanked with A- and B-site was amplified by PCR with primers pUC-*ApaI\_sense* and pUC-*SpeI\_anti*, cut with *ApaI* and *SpeI*, and the 2.7 kbp DNA fragment was ligated with equally treated vector pMRS101 resulting in plasmids pMRS3-*pauR*-AB. As last step, the pMB1 origin was removed from plasmid pMRS3-*pauR*-AB by treatment with restriction enzyme *NotI* and re-ligating the 9.5 kbp vector backbone resulted in suicide plasmid pMRS3-1-*pauR*-AB that was finally transferred into *E. coli* strain ST18. For construction of pBAD-Cherry, *mCherry* (750 bp) was amplified by PCR using primers *Cherry\_AflIII\_fwd* and *Cherry\_SacI\_rev* using the Plasmid pBR-Cherry (3) as template, and cloned into pBAD33 (4) using restriction sites *AflIII* and *SacI*. Expression *mCherry* is not under the control of the arabinose inducible *araBAD* promoter (4). Correct construction was verified by sequence analysis using primer *mCherry-Seq\_fwd*.

For construction of pBAD-Cherry/*pcfA*, 250 bp of the region upstream the *pcfABCDEF* operon was amplified by PCR using primers *P04068\_XmaI\_fwd* and *P04068\_BamHI\_rev* using *P. asymbiotica* genomic DNA as template, and cloned into plasmid pBAD33-Cherry (this study) using restriction sites *XmaI* and *XbaI*. Correct insertion was verified by sequence analysis using primer *mCherry-Seq\_fwd*. For construction of pBAD-Cherry/*pauR*, 400 bp of the region upstream *pauR* was amplified by PCR using primers *P04062\_BamHI\_fwd* and *P04062\_XmaI\_rev* using *P. asymbiotica* genomic DNA as template, and cloned into plasmid pBAD33-Cherry (this study) using restriction sites *BamHI* and *XmaI*. Correct insertion was verified by sequence analysis using primer *mCherry-Seq\_fwd*. For construction of pBRCherry/*darA*, 390 bp of the region upstream of the *darABC* operon (*pau02400-pau02402*) was amplified by PCR using primers *PdarA\_XmaI\_fwd* and *PdarA\_BamHI\_rev* using *P. asymbiotica* genomic DNA as template, and cloned into plasmid pBAD33-Cherry (this study) using restriction sites *XmaI* and *BamHI*. Correct insertion was verified by sequence analysis using *mCherry-Seq\_fwd*.

The complete *pcfABCDEF/pauR* genomic region was cloned into expression vector pBAD24 so that the region is under control of the arabinose inducible *araBAD* promoter (4). The region was previously amplified in two parts by PCR using primers

Pau\_4062\_NheI\_sense1 and Pau\_4064\_XmaI\_anti1 or Pau\_4064\_XmaI\_sense1 and Pau\_4068\_PstI\_anti1, respectively, using genomic *P. asymbiotica* PB68.1 DNA as template. The two PCR products 3.7 kbp (*pauR/pcfEF*) and 5.1 kbp (*pcfABCD*) were cloned in two steps into pBAD24 using restriction sites NheI, XbaI and PstI resulting in plasmid pBAD/*pcfABCDEF/pauR*. For construction of the pBAD/*pcfABCDEF* plasmid, the region was previously amplified in two parts by PCR using primers Pau\_4063\_PstI\_sense1 and Pau\_4064\_XmaI\_anti1 or Pau\_4064\_XmaI\_sense1 and Pau\_4068\_NheI\_anti1, respectively, using genomic *P. asymbiotica* DNA as template and the two PCR products 2.6 kbp (*pcfEF*) and 5.1 kbp (*pcfABCD*) were cloned in two steps into pBAD24 using restriction sites PstI, XmaI and NheI.

For construction of pBAD24-His-*pauR*, *pauR* (717 bp) was amplified by PCR using the primers PAU4062-His-NheI\_fwd and 4062\_Sall\_rev using *P. asymbiotica* PB68.1 genomic DNA as template, and cloned into plasmid pBAD24 (4) using restriction sites NheI and Sall. Correct insertion was verified by sequence analysis using primer pBAD24\_Seq\_sense. The generation of *pauR* variants was achieved with two-step PCR using the appropriate primer pairs and *P. asymbiotica* PB68.1 genomic DNA as template to gain the respective amino acid substitution (Pau\_T62A\_fwd and Pau\_T62A\_rev, Pau\_Y66A\_fwd and Pau\_Y66A\_rev or Pau\_D75A\_fwd and Pau\_D75A\_rev, respectively). The overlap PCR was performed using the primers PAU4062-His-NheI\_fwd and 4062\_Sall\_rev and the fragment was cloned into plasmid pBAD24 using restriction sites NheI and Sall. Correct insertion was verified by sequence analysis using primer pBAD24\_Seq\_sense.

For construction of the reporter plasmid pBBR1-MCS5-TT-RBS-*P<sub>pcfA</sub>-lux*, 250 bp of the region upstream of *pcfA* (*pau\_04068*) was amplified by PCR using primers P04068\_XmaI\_fwd and P04068\_XbaI\_rev using *P. asymbiotica* PB68.1 genomic DNA as template, and cloned into plasmid pBBR1-MCS5-TT-RBS-*lux* (5) using restriction sites XbaI and XmaI. Correct insertion was verified by sequence analysis using primer pNTPS\_Seq\_fwd.

### Competent cells and transformations

*E. coli* cells were made chemically competent using a modified RbCl method and transformed as described earlier (6). *P. asymbiotica* was made electrocompetent and transformed by electroporation. Cells of *P. asymbiotica* were cultivated aerobically in

CASO medium at 37°C up to an OD<sub>600</sub> of 0.8-1.0. Then, cells were harvested by centrifugation at room temperature, the cell pellet was resuspended in the same volume of 10% (v/v) glycerol, and collected again by centrifugation. Cells were then washed in 1/2 of starting volume, and then in 1/20 of starting volume of 10% (v/v) glycerol, and then resuspended in 1/300 of starting volume in 10% (v/v) glycerol. For the following electroporation step, 60 µl of cell suspension were mixed with 100 ng plasmid-DNA, incubated at room temperature for 10 min, and then transferred into 0.2 cm electroporation cuvettes. Electroporation was performed with a pulse of 2.500 V for 4-6 msec. Subsequently, cells were removed from the cuvettes by flushing with 1 ml CASO medium, and incubated aerobically at 37°C for 1.5 h. The complete transformation samples were spread on appropriate agar plates and incubated at 37°C for two days.

#### **Generation of the gene knockouts in *P. asymbiotica***

Generation of *P. asymbiotica* PB68.1  $\Delta$ *pauR* (*pau\_04062*) was performed by homologous recombination of a kanamycin cassette replacing the *pauR* gene. The conjugative plasmid transfer from donor strain *E. coli* ST18 pMRS3-1-*pauR*-AB into *P. asymbiotica* PB68.1 was performed with the filter mating method (7). Therefore, the donor strain was cultivated in LB broth and the recipient strain *P. asymbiotica* PB68 in CASO medium up to an optical density (OD<sub>600</sub>) of 0.6 (donor) or 0.8 (recipient). Then, a volume of 1 ml donor cells were harvested by centrifugation, washed three-times with CASO medium and resuspended in a volume of 30 µl. A volume of 5 ml of the recipient was harvested by centrifugation and resuspended in a volume of 30 µl. Donor and recipient were pooled and dropped onto a nitrocellulose filter that was positioned in the middle of a CASO agar plate. After incubation for 24 h at 37°C, the complete cell material was scraped from the filter, suspended in 1 ml CASO medium, spread onto CASO medium plates containing kanamycin and incubated for 2 days at 37°C. As the donor has a 5-aminolevulinic acid (ala) auxotrophy, this strain is not able to grow on CASO medium. Then, exconjugants were inoculated for 24 h in liquid CASO medium containing 10% (w/v) sucrose and kanamycin and then streaked on CASO medium containing 10% (w/v) sucrose and kanamycin. Clones were checked on streptomycin sensitivity by streaking on CASO agar containing streptomycin. Genomic DNA was prepared using the “Ultra-Clean Microbial DNA Isolation Kit” (Mo-Bio Laboratories Inc., Carlsbad, CA) of Kan<sup>R</sup>,

Suc<sup>R</sup> and Strep<sup>S</sup> clones, and the correct replacement of the *pauR* gene with the kanamycin cassette was verified by PCR using primers annealing outside the 600 bp homology arms (PauR\_check\_fwd and Kan\_LB\_anti or PauR\_check\_rev and Kan\_RB\_sense, respectively) and DNA sequencing.

The *darB* (*pau\_02401*) insertion mutant was generated using the suicide vector pNPTS138-R6KT (8). Briefly, a 577 bp fragment within *darB* was amplified with restriction site modified primers darB\_KI\_EcoRV\_fwd and darB\_KI\_NheI\_rev and cloned into pNPTS138-R6KT via NheI and EcoRV. The final construct, pNPTS138-R6KT-*darB*, was then transferred into *E. coli* ST18 by transformation, and subsequently used for conjugation with *P. asymbiotica* PB68.1. Mutants were verified genotypically by PCR using the primer DarAB\_Check\_rev1 and pDS132 vector specific primers pDS\_Seq\_fwd resulting in 2.9 kbp DNA fragments and DarAB\_Check\_fwd1 and pDS132 vector specific primers pDS\_Seq\_rev resulting in 3.2 kbp DNA fragments. The correct insertion mutant was further verified phenotypically by HPLC-MS analysis for the loss of DAR production.

### Heatmap

The phylogenetic analysis was based on a 646 bp region of *recA* for different *Photorhabdus* and *Xenorhabdus* strains with *E. coli* as outgroup (9). The data obtained from the LC-MS spectra of the different strains was analyzed regarding the relative amount of produced compounds and connected to the results of the phylogenetic analysis. ESI HPLC MS analysis was performed with a Dionex UltiMate 3000 system coupled to a Bruker Amazon X mass spectrometer using an Acquity UPLC BEH C18 1.7 µm RP column (Waters) as described previously (10).

### Phylogenetic analysis

The phylogenetic analysis of ketosynthases and LuxR-like proteins was calculated using the PHYML (11) algorithm with standard parameters. DarA (WP\_012794415.1), DarB (WP\_012794414.1) and DarC (WP\_012794409.1) from *Chitinophaga pinensis* DSM 2588, LuxI (WP\_005423459.1), full-length LuxR (WP\_005423460) and its HTH domain (aa 185-241) from *Aliivibrio fischeri* was used to search the *darB* encoding genomes. The underlying multiple sequence alignment was generated using the ClustalW (12) alignment also with standard parameters. For visualization and calculation of the alignment as well as the PHYML tree the

Geneious software (Biomatters Ltd., New-Zeeland) was used.

**Table S1: Strains.**

| Strain                                               | Genotype                                                                                                                                                                                                     | Reference                       |
|------------------------------------------------------|--------------------------------------------------------------------------------------------------------------------------------------------------------------------------------------------------------------|---------------------------------|
| <i>P. asymbiotica</i><br>PB68.1                      | Wild-type isolate                                                                                                                                                                                            | (9)                             |
| <i>P. asymbiotica</i><br>ATCC 43949                  | Wild-type isolate                                                                                                                                                                                            | (13)                            |
| <i>P. asymbiotica</i><br>PB68.1 $\Delta$ <i>pauR</i> | PB68.1 $\Delta$ <i>pauR</i> :: <i>Km<sup>R</sup></i> ( <i>pau_04062</i> )                                                                                                                                    | This study                      |
| <i>P. asymbiotica</i><br>PB68.1 <i>darB</i>          | PB68.1 <i>darB</i> :: <i>Km<sup>R</sup></i> ( <i>pau_02401</i> )                                                                                                                                             | This study                      |
| <i>E. coli</i> LMG194                                | F <sup>-</sup> $\Delta$ <i>lacX74 galE galK thi rpsL <math>\Delta</math>phoA</i><br>(PvuII) $\Delta$ <i>ara714 leu</i> ::Tn10                                                                                | (4)                             |
| <i>E. coli</i> S17- $\lambda$ <i>pir</i>             | Tp <sup>R</sup> Sm <sup>R</sup> <i>recA thi pro hsdR-M<sup>+</sup>RP4</i> : 2-<br>Tc:Mu: Km Tn7 $\lambda$ <i>pir</i>                                                                                         | Biomedal S.L.,<br>Seliva, Spain |
| <i>E. coli</i> ST18                                  | <i>E. coli</i> S17 $\lambda$ <i>pir</i> $\Delta$ <i>hemA</i>                                                                                                                                                 | (14)                            |
| <i>E. coli</i> JM109                                 | <i>recA1 endA1 gyrA96 thi hsdR17 supE44<math>\lambda</math>relA1 <math>\Delta</math>(lac-</i><br><i>proAB)/F<sup>'</sup> traD36 proA<sup>+</sup>B<sup>+</sup> lacI<sup>q</sup>lacZ<math>\Delta</math>M15</i> | (15)                            |
| <i>E. coli</i> BL21 DE3                              | F <sup>-</sup> <i>ompT gal dcm lon hsdSB(rB- mB) <math>\lambda</math>(DE3)</i>                                                                                                                               | (16)                            |

Table S2: Plasmids.

| Plasmid                           | Characteristics                                                                                                           | Reference                          |
|-----------------------------------|---------------------------------------------------------------------------------------------------------------------------|------------------------------------|
| <b>pBAD24</b>                     | Expression vector, arabinose inducible promoter, Amp <sup>R</sup>                                                         | (4)                                |
| <b>pBAD-<i>pcfABCDEF</i></b>      | <i>pcfABCDEF</i> ( <i>pau_04068-pau_04063</i> ) operon in pBAD24                                                          | This study                         |
| <b>pBAD-<i>pcfABCDEF/pauR</i></b> | <i>pcfABCDEF</i> operon and <i>pauR</i> ( <i>pau_04068-pau_04062</i> ) in pBAD24                                          | This study                         |
| <b>pBR-Cherry</b>                 | <i>mcherry</i> in pBR322                                                                                                  | (3)                                |
| <b>pBAD33</b>                     | Expression vector, arabinose inducible promoter, Cm <sup>R</sup>                                                          | (4)                                |
| <b>pBAD-Cherry</b>                | mCherry in pBAD33                                                                                                         | This study                         |
| <b>pBAD-Cherry/<i>pcfA</i></b>    | <i>pcfA</i> -promoter upstream of <i>mcherry</i> in pBAD33                                                                | This study                         |
| <b>pBAD-Cherry/<i>pauR</i></b>    | <i>pauR</i> -promoter upstream of <i>mcherry</i> in pBAD33                                                                | This study                         |
| <b>pBAD-Cherry/<i>darA</i></b>    | <i>darA</i> -promoter upstream of <i>mcherry</i> in pBAD33                                                                | This study                         |
| <b>pBAD24-<i>darABC/mtaA</i></b>  | <i>darABC</i> -operon from <i>P. asymbiotica</i> and <i>mtaA</i>                                                          | (17)                               |
| <b>pACYC-<i>bkdABC/ngrA</i></b>   | <i>bkdABC</i> -operon and <i>ngrA</i> both from <i>P. luminescens</i>                                                     | (18)                               |
| <b>pUC19</b>                      | Cloning vector, Amp <sup>R</sup>                                                                                          | (15)                               |
| <b>pUC19-Kan</b>                  | Km <sup>R</sup> cassette in pUC19                                                                                         | (H. Jung, München, Lab Collection) |
| <b>pUC-Kan-<i>pauR</i>-FA</b>     | 600 bp upstream region of <i>pauR</i> cloned upstream of Km <sup>R</sup> cassette                                         | This study                         |
| <b>pUC-Kan-<i>pauR</i>-AB</b>     | 600 bp up- and downstream regions of <i>pauR</i> cloned up- and downstream of Kan <sup>R</sup> ( <i>pauR</i> -interposon) | This study                         |
| <b>pMRS101</b>                    | Conjugation vector, R6K ori, pMB1 ori, Strep <sup>R</sup> , <i>sucB</i>                                                   | (2)                                |
| <b>pMRS3-<i>pauR</i>-AB</b>       | <i>pauR</i> -interposon in pMRS101                                                                                        | This study                         |
| <b>pMRS3-1-<i>pauR</i>-AB</b>     | <i>pauR</i> -interposon in pMRS101, ΔpMB1 ori                                                                             | This study                         |
| <b>pNPTS138-R6KT</b>              | <i>mobRP4</i> <sup>+</sup> ori-R6K <i>sacB</i> ; suicide plasmid for deletions; Kan <sup>R</sup>                          | (19)                               |
| <b>pNPTS138-R6KT-<i>darB</i></b>  | Intergenic region of 577 bp of <i>darB</i> in pNPTS138-R6KT                                                               | This study                         |
| <b>pBAD24-His-<i>pauR</i></b>     | <i>pauR</i> ( <i>pau_04062</i> ) in pBAD24 with N-                                                                        | This study                         |



|                                               |                                                                                                                                      |            |
|-----------------------------------------------|--------------------------------------------------------------------------------------------------------------------------------------|------------|
|                                               | terminal His-tag                                                                                                                     |            |
| <b>pBAD24-His-pauR-T62A</b>                   | Substitution of T62A in <i>pauR</i> ( <i>pau_04062</i> ) in pBAD24                                                                   | This study |
| <b>pBAD24-His-pauR-Y66A</b>                   | Substitution of Y66A in <i>pauR</i> ( <i>pau_04062</i> ) in pBAD24                                                                   | This study |
| <b>pBAD24-His-pauR-D75A</b>                   | Substitution of D75A in <i>pauR</i> ( <i>pau_04062</i> ) in pBAD24                                                                   | This study |
| <b>pBBR1-MCS5-TT-RBS-lux</b>                  | <i>luxCDABE</i> and terminators lambda T0 rrnB1 T1 cloned into pBBR1-MCS5 for plasmid-based transcriptional fusions; Gm <sup>R</sup> | (5)        |
| <b>pBBR1-MCS5-TT-RBS-P<sub>pcfA</sub>-lux</b> | <i>luxCDABE</i> under the control of the <i>pcfA</i> ( <i>pau_04068</i> ) promoter                                                   | This study |

Table S3: Oligonucleotides.

| Oligo                 | Sequence                                                            |
|-----------------------|---------------------------------------------------------------------|
| PauR_FA_SacI_fwd      | 5'-TAGCCGAGCTCGCACCATCACCTGTTTCAG-3'                                |
| PauR_FA_XmaI_rev      | 5'-TAGCCCCCGGGAAGATTTCTCTCATTAAATAAT-3'                             |
| PauR_FB_SalI_fwd      | 5'-TAGCCGTCGACTAATTAGAGCCCGATTAAAG-3'                               |
| PauR_FB_HindIII_rev   | 5'-TAGCCAAGCTTGGAAGACACGCTATTGCG-3'                                 |
| P04068_XmaI_fwd       | 5'-TAGCCCCCGGGTTTTTCGGTCAATGTGAAGAACAT-3'                           |
| P04068_BamHI_rev      | 5'-TAGCCGGATCCGAAATTTTATTTATATAGC-3'                                |
| P04062_XmaI_rev       | 5'-TAGCCCCCGGGAAGATTTCTCTCATTAAATAA-3'                              |
| P04062_BamHI_fwd      | 5'-TAGCCGGATCCCAACGCATCACATAACCCTG-3'                               |
| PdarA_XmaI_fwd        | 5'-TAGCCCCCGGGATGTTCTAACCTTTATGGGTA-3'                              |
| PdarA_BamHI_rev       | 5'-TAGCCGGATCCCAATTTTATTTATTATCTTG-3'                               |
| mCherry-Seq_fwd       | 5'-CCCTTAGTAACTTTTAGC-3'                                            |
| PAU_4062_NheI_sense_1 | 5'TAGCCGCTAGCGGCACCGCTGGAGAACGACTTTCC-3'                            |
| PAU_4068_PstI_anti_1  | 5'TAGCCCTGCAGGGTCATTTATTTTATCCTATTCTATATG-3'                        |
| PAU_4064_XmaI_sense_1 | 5'TAGCCCCCGGGTATGCCTACTGGGATAGATTTTTATC-3'                          |
| PAU_4064_XmaI_anti_1  | 5'TAGCCCCCGGGGAAGTTAATTTGAGTGTTGCCCAGC-3'                           |
| PAU_4063_PstI_sense_1 | 5'TAGCCCTGCAGCTATGAAATATAATTCGCCAAAATACC-3'                         |
| PAU_4068_NheI_anti_1  | 5'TAGCCGCTAGCGGTCAATTTATTTTATCCTATTCTATATG-3'                       |
| PAU4062-His-NheI_fwd  | 5'-GAGGAAGCTAGCCGCACCACCATCATCACCATCC<br>CGGGATCTTATGAATACTTTATT-3' |
| 4062_SalI_rev         | 5'-TAGCCGTCGACTTATATGATTAGATTATATGC-3'                              |
| pBAD24_Seq_sense      | 5'-GCCGTCACTGCGTCTTTTACTGG-3'                                       |
| PAU_T62A_fwd          | 5'-TTTACACACAGAA GCA ATGGGTAA-3'                                    |
| PAU_T62A_rev          | 5'-TTACCCAT TGC TTCTGTGTGTA-3'                                      |
| PAU_Y66A_fwd          | 5'-CATGGGTAATGCTGATAAA-3'                                           |
| PAU_Y66A_rev          | 5'-TTTATCAGCATTACCCATG-3'                                           |
| PAU_D75A_fwd          | 5'-CATGACAGT GCT CAACTAATG-3'                                       |
| PAU_D75A_rev          | 5'-CATTAGTTG AGC ACTGTCATG-3'                                       |
| P04068_XbaI_rev       | 5'-TAGCC TCTAGA GAAATTTTATTTATATAGC-3'                              |
| pNTPS_Seq_fwd         | 5'-GTCATATTTGCCCTCTGG-3'                                            |
| PauR_check_fwd        | 5'-GTTAATGCTTCGATCCATCC-3'                                          |
| PauR_check_rev        | 5'-GCAAAATCTCGGTGCATTCC-3'                                          |
| Kan_RB_sense          | 5'-GGATTCATCGACTGTGGCCG-3'                                          |
| Kan_LB_anti           | 5'-CAGTCATAGCCGAATAGCCT-3'                                          |
| darB_KI_EcoRV_fwd     | 5'-TAGCCGATATCCCCAATAGATAATGATACAAT-3'                              |
| darB_KI_NheI_rev      | 5'-TAGCCGCTAGCCCGTGGTTTATTTCAAGCA-3'                                |
| pDS_Seq_fwd           | 5'-GCATGGGCATAAAGTTGCC-3'                                           |
| pDS_Seq_rev           | 5'-CTAAGCTCTCATGTTTGAAC-3'                                          |
| DarAB_Check_fwd1      | 5'-GCCCCGCTATGATAATAAAGGAGATAG-3'                                   |
| DarAB_Check_rev1      | 5'-CCCCTCATTTAAGTGTCTAAC-3'                                         |
| Cherry_AflIII_fwd     | 5'-TAGCCCTTAAGTTATTTGTATAGTTCATCC-3'                                |
| Cherry_SacI_rev       | 5'-TAGCC GAGCTC ATGGCAACTAGCGGCATGGT-3'                             |

**Table S4: The loss of PauR binding to compound 6 (DAR) *in silico* using the built-in residue scan function of MOE 2013.0802.** A positive number indicates a loss of affinity or stability, respectively. To investigate the effect of single amino acid substitutions inside the PauR binding pocket considering the binding-affinity of PauR and its ligand, a virtual mutagenesis was performed for T62, Y66 and D75. All three residues were replaced with alanine and with the in-built residue scan function of MOE 2013.0802 the ligand affinity and protein stability was predicted. For wild-type PauR an affinity and stability to the docked DAR (**6**) of -7.31 kcal/mol and -13.26 kcal/mol were calculated, respectively. The Y66A derivative showed the highest loss of ligand affinity with destabilizing increase of +1.64 kcal/mol for affinity and +4.27 kcal/mol for protein stability, for the D75A derivative a small change of ligand affinity (+0.39 kcal/mol) has been observed which could be explained with a rise in protein stability (-4.01 kcal/mol). The same is true for the T62A derivative, which showed a small loss of ligand affinity (+0.41 kcal/mol) while the protein stability is increased (-0.82 kcal/mol). These results indicate the change of DAR binding by these PauR derivatives and confirm the experimentally demonstrated importance for binding of Y66. As a control, similar experiments were performed with QscR (-10.68 kcal/mol affinity and -1.99 kcal/mol stability, respectively, for the QscR-AHL complex), which has also been characterized experimentally regarding amino acids required for AHL binding and all experimental data showing a decrease of AHL-binding could be confirmed *in silico*.

|                        | $\Delta$ ligand affinity | $\Delta$ protein stability |
|------------------------|--------------------------|----------------------------|
| <b>PauR derivative</b> |                          |                            |
| T62A                   | +0.41                    | -0.82                      |
| Y66A                   | +1.64                    | +4.27                      |
| D75A                   | +0.39                    | -4.01                      |
| <b>QscR derivative</b> |                          |                            |
| S38A                   | +0.10                    | -2.47                      |
| G40F                   | +2.94                    | +11.47                     |
| S56G                   | +0.60                    | +2.07                      |
| D75A                   | +2.64                    | -2.37                      |
| V78F                   | +2.08                    | +1.79                      |
| L82F                   | +0.11                    | +2.95                      |

**Table S5: Ketosynthases (KS) used for the phylogenetic tree.** Referred to Fuchs *et al.* (17), all newly identified *darB* genes are shown in red.

|    | <b>Protein</b>                       | <b>Organism</b>                                     | <b>Accession number</b> |
|----|--------------------------------------|-----------------------------------------------------|-------------------------|
|    | <b>Closest BLAST-P hits for PpyS</b> |                                                     |                         |
| 1  | 3-Oxoacyl-ACP synthase III           | <i>Burkholderia</i> sp. CCGE1001                    | YP_004230959            |
| 2  | 3-Oxoacyl-ACP synthase III           | <i>Burkholderia phenoliruptrix</i> BR3459a          | YP_006793509            |
| 3  | 3-Oxoacyl-ACP synthase III           | <i>Burkholderia</i> sp. CCGE1003                    | YP_003910175            |
| 4  | 3-Oxoacyl-ACP synthase III           | <i>Burkholderia phytotfirmans</i> PsJN              | YP_001889944            |
| 5  | hypothetical protein                 | <i>Chlorogloeopsis</i>                              | WP_016876568            |
| 6  | hypothetical protein                 | <i>Anabaena</i> sp. PCC 7108                        | WP_016949109            |
| 7  | <i>PpyS</i>                          | <i>P. luminescens</i> subsp. <i>laumondii</i>       | AGO97060                |
| 8  | 3-Ketoacyl-CoA thiolase              | <i>Pseudomonas</i> sp. GM30                         | WP_007967127            |
| 9  | 3-Oxoacyl-ACP synthase I             | <i>Xenorhabdus bovienii</i> SS-2004                 | YP_003469508            |
| 10 | 3-Oxoacyl-ACP synthase               | <i>Xenorhabdus nematophila</i> ATCC 19061           | YP_003713506            |
| 11 | 3-Oxoacyl-ACP synthase               | <i>Xenorhabdus nematophila</i> ATCC 19061           | WP_010847197            |
|    | <b>Closest BLAST-P hits for XcIC</b> |                                                     |                         |
| 12 | 3-Oxoacyl-ACP synthase               | <i>C. acetobutylicum</i>                            | NP_347450.1             |
| 13 | 3-Oxoacyl-ACP synthase               | <i>P. lactis</i>                                    | WP_007130623.1          |
| 14 | 3-Oxoacyl-ACP synthase               | <i>B. thuringiensis</i>                             | YP_006930640.1          |
| 15 | 3-Oxoacyl-ACP synthase               | <i>B. sp. 1NLA3E</i>                                | YP_007911827.1          |
| 16 | 3-Oxoacyl-ACP synthase               | <i>O. scapharcae</i>                                | WP_010098042.1          |
| 17 | 3-Oxoacyl-ACP synthase               | <i>P. polymyxa</i>                                  | YP_003947618.1          |
| 18 | 3-Oxoacyl-ACP synthase               | <i>P. polymyxa</i>                                  | YP_003871436.1          |
| 19 | 3-Oxoacyl-ACP synthase               | <i>P. sp. Aloe-11</i>                               | WP_007431139.1          |
| 20 | 3-Oxoacyl-ACP synthase               | <i>P. terrae</i>                                    | YP_005077926.1          |
| 21 | 3-Oxoacyl-ACP synthase               | <i>P. peoriae</i>                                   | WP_010345468.1          |
|    | <b>FabH</b>                          |                                                     |                         |
| 22 | CorB                                 | <i>Corallococcus coralloides</i>                    | ADI59524                |
| 23 | Myxopyronin ketosynthase             | <i>Myxococcus fulvus</i>                            | AGS77282                |
| 24 | FabHB                                | <i>B. subtilis</i>                                  | NP_388898               |
| 25 | FabH                                 | <i>N. punctiforme</i>                               | YP_001865657            |
| 26 | 3-oxoacyl-ACP synthase               | <i>B. subtilis</i>                                  | NP_389015.1             |
| 27 | FabH                                 | <i>A. fabrum</i>                                    | NP_354198               |
| 28 | FabH                                 | <i>P. luminescens</i>                               | NP_930069               |
| 29 | FabH                                 | <i>E. coli</i>                                      | NP_287225               |
| 30 | FabH                                 | <i>S. griseus</i>                                   | YP_001826619            |
| 31 | FabH                                 | <i>S. echinatus</i>                                 | AAV84077                |
| 32 | NP_626634                            | <i>S. coelicolor</i> A3(2)                          | NP_626634               |
| 33 | FabH                                 | <i>S. avermitilis</i>                               | BAC73499                |
| 34 | Q54206                               | <i>S. glaucescens</i>                               | Q54206                  |
| 35 | FdmS                                 | <i>S. griseus</i>                                   | AAQ08929                |
| 36 | CAM58805_S._sp._BenQ                 | <i>S. sp. A2991200</i>                              | CAM58805                |
| 37 | ZhuH 1MZJ                            | <i>S. sp. R1128</i>                                 | AAG30195                |
| 38 | Frnl                                 | <i>S. roseofulvus</i>                               | AAC18104                |
| 39 | Alnl                                 | <i>S. sp. CM020</i>                                 | ACI88883                |
| 40 | OleA                                 | <i>Xanthomonas campestris</i> pv. <i>campestris</i> | 3S21 (PDB)              |
|    | <b>KS type III PKS</b>               |                                                     |                         |
| 41 | Chs-like                             | <i>R. baltica</i>                                   | NP_868579               |
| 42 | BPS (PLN03172)                       | <i>H. androsaemum</i>                               | Q8SAS8                  |
| 43 | CHS H. (PLN03173)                    | <i>H. androsaemum</i>                               | Q9FUB7                  |

|    |                                           |                                         |                |
|----|-------------------------------------------|-----------------------------------------|----------------|
| 44 | CHS9                                      | <i>M. sativa</i>                        | AAA02827       |
| 45 | STS                                       | <i>P. quinquefolia</i>                  | AAM21773       |
| 46 | BAS                                       | <i>R. palmatum</i>                      | AAK82824       |
| 47 | BpsA                                      | <i>Bacillus subtilis str. 168</i>       | NP_390087      |
| 48 | MXAN_6639                                 | <i>M. xanthus</i>                       | YP_634756      |
| 49 | PKS10                                     | <i>M. tuberculosis</i>                  | NP_216176      |
| 50 | PKS11                                     | <i>M. tuberculosis</i>                  | NP_216181      |
| 51 | Cpz6 Capramyzin<br>ketosynthase           | <i>Streptomyces sp. MK730-<br/>62F2</i> | (20)           |
| 52 | Germicidin synthase                       | <i>Streptomyces coelicolor</i>          | 3V71_A         |
| 53 | RppA S                                    | <i>S. antibioticus</i>                  | BAB91443       |
| 54 | RppA                                      | <i>S. avermitilis</i>                   | NP_828307      |
| 55 | RppB                                      | <i>S. antibioticus</i>                  | BAB91444       |
|    | <b>KS adjacent to XcIA<br/>homologues</b> |                                         |                |
| 56 | 3-Oxoacyl-ACP synthase                    | <i>C. sp. PCC 7822</i>                  | YP_003899922.1 |
| 57 | 3-Oxoacyl-ACP synthase                    | <i>N. punctiforme</i>                   | YP_001865657.1 |
| 58 | 3-Oxoacyl-ACP synthase                    | <i>A. cylindrica</i>                    | YP_007155727.1 |
|    | <b>Closest BLAST-P hits for<br/>XcIB</b>  |                                         |                |
| 59 | 3-Oxoacyl-ACP synthase III                | <i>B. sp. EniD312</i>                   | WP_009111263.1 |
| 60 | 3-Oxoacyl-ACP synthase III                | <i>A. nasoniae</i>                      | CBA73264.1     |
| 61 | 3-Oxoacyl-ACP synthase III                | <i>P. carotovorum</i>                   | WP_010301235.1 |
| 62 | 3-Oxoacyl-ACP synthase III                | <i>P. pacifica</i>                      | WP_006975318.1 |
| 63 | 3-Oxoacyl-ACP synthase III                | <i>C. stagnale</i>                      | YP_007317906.1 |
| 64 | 3-Oxoacyl-ACP synthase III                | <i>N. punctiforme</i>                   | YP_001865628.1 |
| 65 | 3-Oxoacyl-ACP synthase III                | <i>R. sp. PCC 7116</i>                  | YP_007056099   |
| 66 | 3-Oxoacyl-ACP synthase III                | <i>S. cyanosphaera</i>                  | YP_007130807.1 |
| 67 | 3-Oxoacyl-ACP synthase III                | <i>Calothrix sp. PCC 6303</i>           | YP_007138278   |
| 68 | 3-Oxoacyl-ACP synthase III                | <i>N. punctiforme</i>                   | YP_001868566.1 |
| 69 | 3-Oxoacyl-ACP synthase III                | <i>R. sp. PCC 7116</i>                  | YP_007057764.1 |
|    | <b>ChIB6; CerJ; KSIII DpsC-like</b>       |                                         |                |
| 70 | ChIB6                                     | <i>S. antibioticus</i>                  | AAZ77679       |
| 71 | CerJ                                      | <i>S. tendae</i>                        | AEI91069       |
| 72 | CosE                                      | <i>S. olindensis</i>                    | ABC00733       |
| 73 | DpsC                                      | <i>S. peucetius</i>                     | AAA65208       |
| 74 | AknE2                                     | <i>S. sp. SPB74</i>                     | ZP_04991255.1  |
| 75 | AknE2                                     | <i>S. galilaeus</i>                     | AAF70109       |
| 76 | BAB72048                                  | <i>S. galilaeus</i>                     | BAB72048       |
| 77 | PokM2                                     | <i>S. diastatochromogenes</i>           | ACN64832       |
| 78 | CalO4                                     | <i>S. aurantiaca</i>                    | ZP_01462124    |
| 79 | FabH                                      | <i>S. erythraea</i>                     | YP_001107471   |
| 80 | NdasDRAFT_3133                            | <i>N. dassonvillei</i>                  | ZP_04334033.1  |
| 81 | ChIB3                                     | <i>S. antibioticus</i>                  | AAZ77676       |
| 82 | CalO4                                     | <i>M. echinospora</i>                   | AAM70354       |
| 83 | AviN                                      | <i>S. viridochromogenes</i>             | AAK83178       |
| 84 | PlaP2                                     | <i>S. sp. Tu6071</i>                    | ABB69750       |
| 85 | CouN2                                     | <i>S. rishiriensis</i>                  | AAG29787       |
| 86 | CloN2                                     | <i>S. roseochromogenes</i>              | AAN65231       |
|    | <b>KS type I PKS</b>                      |                                         |                |
| 87 | Plu1885                                   | <i>P. luminescens</i>                   | NP_929153      |
| 88 | NanA8                                     | <i>S. nanchangensis</i>                 | AAP42874       |
| 89 | EryAll                                    | <i>S. erythraea</i>                     | YP_001102990   |
| 90 | TylGI KSQ                                 | <i>S. fradiae</i>                       | AAB66504       |
| 91 | MerA                                      | <i>S. violaceusniger</i>                | ABJ97437       |
| 92 | TamAI                                     | <i>S. sp. 3079</i>                      | ADC79637       |
| 93 | OleAI KSQ                                 | <i>S. antibioticus</i>                  | AAF82408       |
| 94 | HedT                                      | <i>S. griseoruber</i>                   | AAP85336       |
|    | <b>Closest BLAST-P hits for<br/>XcIF</b>  |                                         |                |
| 95 | 3-Oxoacyl-ACP synthase                    | <i>R. blandensis</i>                    | WP_008043745.1 |

|     |                                           |                            |                |
|-----|-------------------------------------------|----------------------------|----------------|
| 96  | 3-Oxoacyl-ACP synthase                    | <i>X. nematophila</i>      | YP_003714026.1 |
| 97  | 3-Oxoacyl-ACP synthase                    | <i>X. nematophila</i>      | WP_010848687.1 |
| 98  | 3-Oxoacyl-ACP synthase                    | <i>M. sp. PE36</i>         | WP_006034384.1 |
| 99  | 3-Oxoacyl-ACP synthase                    | <i>P. profundum</i>        | YP_132684.1    |
| 100 | 3-Oxoacyl-ACP synthase                    | <i>P. damsela</i>          | WP_005305524.1 |
| 101 | 3-Oxoacyl-ACP synthase                    | <i>P. sp. AK15</i>         | WP_007465048.1 |
| 102 | 3-Oxoacyl-ACP synthase                    | <i>P. leiognathi</i>       | WP_008989540.1 |
| 103 | 3-Oxoacyl-ACP synthase                    | <i>P. sp. SKA34</i>        | WP_006644045.1 |
| 104 | 3-Oxoacyl-ACP synthase                    | <i>P. angustum</i>         | WP_005364526.1 |
|     | <b>FabF</b>                               |                            |                |
| 105 | FabF                                      | <i>M. sp. 4-46</i>         | YP_001771620   |
| 106 | FabF                                      | <i>C. pinensis</i>         | ACU62401       |
| 107 | cpin1855                                  | <i>C. pinensis</i>         | YP_003121552   |
| 108 | Dfer_1997                                 | <i>D. fermentans</i>       | YP_003086385   |
| 109 | FabB                                      | <i>A. pleuropneumoniae</i> | ZP_00134992    |
| 110 | FabB                                      | <i>C. sp. 30_2</i>         | ZP_04562837    |
| 111 | NP_416826                                 | <i>E. coli</i>             | NP_416826      |
| 112 | FabB                                      | <i>S. boydii</i>           | YP_001881145   |
|     | <b>Type II PKS KS <math>\beta</math></b>  |                            |                |
| 113 | NP_344945                                 | <i>S. pneumoniae</i>       | NP_344945      |
| 114 | FabF                                      | <i>T. thermophilus</i>     | YP_143679      |
| 115 | FabF                                      | <i>N. punctiforme</i>      | YP_001867862   |
| 116 | FabF                                      | <i>B. subtilis</i>         | NP_389016      |
| 117 | NP_645683                                 | <i>S. aureus</i>           | NP_645683      |
| 118 | FabF                                      | <i>P. luminescens</i>      | NP_930065      |
| 119 | FabF                                      | <i>E. albertii</i>         | ZP_02902779.1  |
| 120 | FabF                                      | <i>E. coli</i>             | NP_287229      |
| 121 | NP_415613                                 | <i>E. coli</i>             | NP_415613      |
| 122 | FabF                                      | <i>S. avermitilis</i>      | BAC70003       |
|     | <b>Type II PKS KS <math>\alpha</math></b> |                            |                |
| 123 | SimA2                                     | <i>S. antibioticus</i>     | AF324838_4     |
| 124 | TcmL                                      | <i>S. glaucescens</i>      | AAA67516       |
| 125 | EncB                                      | <i>S. maritimus</i>        | AAF81729       |
| 126 | ActIA                                     | <i>S. coelicolor A3(2)</i> | SCO5087        |
| 127 | NcnB                                      | <i>S. arenae</i>           | AAD20268       |
|     | <b>FabB</b>                               |                            |                |
| 128 | AntD (Plu4191)                            | <i>P. luminescens</i>      | NP_931374      |
| 129 | EncA                                      | <i>S. maritimus</i>        | AAF81728       |
| 130 | ActiB                                     | <i>S. coelicolor A3(2)</i> | SCO5088        |
| 131 | NcnA                                      | <i>S. arenae</i>           | AAD20267       |
| 132 | TcmK                                      | <i>S. davawensis</i>       | CCK26894       |
| 133 | SimA1                                     | <i>S. antibioticus</i>     | AAK06784       |
|     | <b>DarB</b>                               |                            |                |
| 134 | O3I_37171                                 | <i>N. brasiliensis</i>     | ZP_09843377    |
| 135 | M446_0174                                 | <i>M. sp. 4-46</i>         | YP_001767187   |
| 136 | cpin6850                                  | <i>C. pinensis</i>         | YP_003126452   |
| 137 | BFO_3187                                  | <i>T. forsythia</i>        | YP_005015826   |
| 138 | NiasoDRAFT_0547                           | <i>N. soli</i>             | ZP_09632794    |
| 139 | Mucpa_6793                                | <i>M. paludis</i>          | ZP_09618305    |
| 140 | Oweho_0889                                | <i>O. hongkongensis</i>    | YP_004988545   |
| 141 | CHU_0390                                  | <i>C. hutchinsonii</i>     | YP_677020      |
| 142 | Fluta_1447                                | <i>F. taffensis</i>        | YP_004344279   |
| 143 | Dfer_5797                                 | <i>D. fermentans</i>       | YP_003090150   |
| 144 | BZARG_2045                                | <i>B. argentinensis</i>    | ZP_08820341    |
| 145 | Lacal_2074                                | <i>L. sp. 5H-3-7-4</i>     | YP_004580348   |
| 146 | Aeqsu_0932                                | <i>A. sublithincola</i>    | YP_006417450   |
| 147 | Zobellia_2074                             | <i>Z. galactanivorans</i>  | YP_004736513   |
| 148 | Lbys_1508                                 | <i>L. byssofila</i>        | YP_003997574   |
| 149 | HMPREF0204_10987                          | <i>C. gleum</i>            | ZP_07085127    |

|     |                     |                                 |                |
|-----|---------------------|---------------------------------|----------------|
| 150 | PMI13_02465         | <i>C. sp.</i> CF314             | ZP_10726507    |
| 151 | HMPREF0156_01383    | <i>B. taxon</i> 274 str. F0058  | ZP_06983320    |
| 152 | HMPREF9071_0527     | <i>C. taxon</i> 338 str. F0234  | ZP_08201061    |
| 153 | CAPGI0001_0843      | <i>C. gingivalis</i>            | ZP_04056582    |
| 154 | HMPREF1154_2288     | <i>C. sp.</i> CM59              | ZP_10880679    |
| 155 | HMPREF1320_1701     | <i>C. taxon</i> 335 str. F0486  | EJF37460       |
| 156 | HMPREF1321_1154     | <i>C. taxon</i> 412 str. F0487  | ZP_10366882    |
| 157 | CAPSP0001_1216      | <i>C. sputigena</i>             | ZP_03390203    |
| 158 | Coch_0547           | <i>C. ochracea</i>              | YP_003140666   |
| 159 | HMPREF1319_0374     | <i>C. ochracea</i>              | EJF43732       |
| 160 | HMPREF1977_1456     | <i>C. ochracea</i>              | ZP_07866642    |
| 161 | Weevi_1554          | <i>W. virosa</i>                | YP_004238832.1 |
| 162 | HMPREF9716_01579    | <i>M. odoratimimus</i>          | EKB07937       |
| 163 | Myrod_1723          | <i>M. odoratus</i>              | ZP_09672239    |
| 164 | HMPREF9711_01694    | <i>M. odoratimimus</i>          | EKB04829       |
| 165 | HMPREF9712_01161    | <i>M. odoratimimus</i>          | ZP_09523568    |
| 166 | Fcol_11845          | <i>F. columnare</i>             | YP_004942963   |
| 167 | FP2279              | <i>F. psychrophilum</i>         | YP_001297136   |
| 168 | PMI10_02641         | <i>F. sp.</i> CF136             | ZP_10730768    |
| 169 | FF52_12311          | <i>F. sp.</i> F52               | ZP_10481912    |
| 170 | Fjoh_1102           | <i>F. johnsoniae</i>            | YP_001193454   |
| 171 | FJSC11DRAFT_3961    | <i>F. sp.</i> JSC-11            | ZP_08987753    |
| 172 | MICAG_1820011       | <i>M. aeruginosa</i>            | CCI22605       |
| 173 | DP1817              | <i>D. psychrophila</i>          | YP_065553      |
| 174 | DaAHT2_1139         | <i>D. alkaliphilus</i>          | YP_003690456   |
| 175 | MldDRAFT_4065       | delta proteobacterium<br>MLMS-1 | ZP_01289639    |
| 176 | CBGD1_514           | <i>S. gotlandica</i>            | ZP_05070248    |
| 177 | SMGD1_1386          | <i>S. gotlandica</i>            | EHP29910       |
| 178 | Sdel_2118           | <i>S. deleyianum</i>            | YP_003305165   |
| 179 | Sulba_2257          | <i>S. barnesii</i>              | YP_006405107   |
| 180 | Arnit_2310          | <i>A. nitrofigilis</i>          | YP_003656468   |
| 181 | HMPREF9401_0244     | <i>A. butzleri</i>              | ZP_07890833    |
| 182 | Hbal_2902           | <i>H. baltica</i>               | YP_003061270   |
| 183 | ParcA3_010100003428 | <i>P. arctica</i>               | ZP_10280196    |
| 184 | PspoU_010100018642  | <i>P. spongiae</i>              | ZP_10300425    |
| 185 | PSJM300_17945       | <i>P. stutzeri</i>              | AFN79642       |
| 186 | MDS_0597            | <i>P. mendocina</i>             | YP_004378380   |
| 187 | Psefu_0435          | <i>P. fulva</i>                 | YP_004472512   |
| 188 | Plu2164             | <i>P. luminescens</i>           | NP_929424      |
| 189 | PA-RVA6-3077        | <i>P. asymbiotica</i>           | CAR66906       |
| 190 | PAU_02401           | <i>P. asymbiotica</i>           | YP_003041237   |
| 191 | PchlO6_4243         | <i>P. chlororaphis</i>          | ZP_10172862    |
| 192 | DarB                | <i>P. chlororaphis</i>          | AAN18032       |
| 193 | Pchl3084_3967       | <i>P. chlororaphis</i>          | EJL05977       |
| 194 | PMI20_00702         | <i>P. sp.</i> GM17              | ZP_10707840    |
| 195 | Daro_2368           | <i>D. aromatica</i>             | YP_285574      |
| 196 | azo0292 DarB        | <i>A. sp.</i> BH72              | YP_931796      |
| 197 | Rfer_3974           | <i>R. ferrireducens</i>         | YP_525203      |
| 198 | Slit_0359           | <i>S. lithotrophicus</i>        | YP_003522988   |
| 199 | PMI12_02025         | <i>V. sp.</i> CF313             | ZP_10567997    |
| 200 | Vapar_3389          | <i>V. paradoxus</i>             | YP_002945272   |
| 201 | Varpa_2231          | <i>V. paradoxus</i>             | YP_004154548   |
| 202 | COI_2002            | <i>M. haemolytica</i>           | ZP_05992665    |
| 203 | COK_0379            | <i>M. haemolytica</i>           | ZP_05988513    |
| 204 | HMPREF9417_0595     | <i>H. parainfluenzae</i>        | ZP_08147854    |
| 205 | HMPREF9952_1824     | <i>H. pittmaniae</i>            | ZP_08755481    |
| 206 | HMPREF9064_0174     | <i>A. segnis</i>                | ZP_07888807    |
| 207 | ATCC33389_0196      | <i>A. aphrophilus</i>           | EGY32238       |
| 208 | NT05HA_1737         | <i>A. aphrophilus</i>           | YP_003008155   |
| 209 | HMPREF9335_01583    | <i>A. aphrophilus</i>           | EHB89432       |

|     |                  |                                           |                |
|-----|------------------|-------------------------------------------|----------------|
| 210 | GCWU000324_02596 | <i>K. oralis</i>                          | ZP_04603113    |
| 211 | EIKCOROL_00456   | <i>E. corrodens</i>                       | ZP_03712789    |
| 212 | HMPREF9371_1043  | <i>N. shayeganii</i>                      | ZP_08886538    |
| 213 | HMPREF9370_1914  | <i>N. wadsworthii</i>                     | ZP_08940206    |
| 214 | NEIFLAOT_02523   | <i>N. flavescens</i>                      | ZP_03720660    |
| 215 | HMPREF0604_01363 | <i>N. mucosa</i>                          | ZP_07993739    |
| 216 | NEIFL0001_0036   | <i>N. flavescens</i>                      | ZP_04757628    |
| 217 | NEISUBOT_03200   | <i>N. subflava</i>                        | ZP_05983976    |
| 218 | NEISICOT_02133   | <i>N. sicca</i>                           | ZP_05318975    |
| 219 | HMPREF9418_1128  | <i>N. macacae</i>                         | ZP_08684521    |
| 220 | HMPREF1051_1749  | <i>N. sicca</i>                           | EIG27057       |
| 221 | HMPREF1028_00835 | <i>N. sp. GT4A_CT1</i>                    | ZP_08888860    |
| 222 | HMPREF9016_01947 | <i>N. taxon 014 str. F0314</i>            | ZP_06980826    |
| 223 | WP_019975306.1   | <i>Empedobacter brevis</i>                | WP_019975306.1 |
| 224 | WP_023570457.1   | <i>Flavobacterium cauense</i>             | WP_023570457.1 |
| 225 | WP_023573188.1   | <i>Flavobacterium enshiense</i>           | WP_023573188.1 |
| 226 | WP_026980395.1   | <i>Flavobacterium suncheonense</i>        | WP_026980395.1 |
| 227 | WP_023575682.1   | <i>Flavobacterium saliperosum</i>         | WP_023575682.1 |
| 228 | WP_025571904.1   | <i>Flavobacterium sp. JGI 0001001-D01</i> | WP_025571904.1 |
| 229 | WP_017496912.1   | <i>Flavobacterium sp. WG21</i>            | WP_017496912.1 |
| 230 | WP_026990035.1   | <i>Flavobacterium subsaxonicum</i>        | WP_026990035.1 |
| 231 | WP_027392755.1   | <i>Aquimarina latercula</i>               | WP_027392755.1 |
| 232 | WP_029271432.1   | <i>Flavobacterium sp. KJJ</i>             | WP_029271432.1 |
| 233 | WP_028979582.1   | <i>Sporocytophaga myxococcoides</i>       | WP_028979582.1 |
| 234 | WP_026450863.1   | <i>Aequorivita capsosiphonis</i>          | WP_026450863.1 |
| 235 | WP_027374092.1   | <i>Chryseobacterium sp. UNC8MFCol</i>     | WP_027374092.1 |
| 236 | WP_027378929.1   | <i>Chryseobacterium daeguense</i>         | WP_027378929.1 |
| 237 | WP_019944308.1   | <i>Dyadobacter beijingensis</i>           | WP_019944308.1 |
| 238 | WP_016870031.1   | <i>Fischerella muscicola</i>              | WP_016870031.1 |
| 239 | WP_026631596.1   | <i>Dyadobacter alkalitolerans</i>         | WP_026631596.1 |
| 240 | WP_026309622.1   | <i>Niabella aurantiaca</i>                | WP_026309622.1 |
| 241 | WP_027412514.1   | <i>Aquimarina muelleri</i>                | WP_027412514.1 |
| 242 | WP_028121069.1   | <i>Epilithonimonas tenax</i>              | WP_028121069.1 |
| 243 | WP_028786430.1   | <i>Terrimonas ferruginea</i>              | WP_028786430.1 |
| 244 | WP_024771996.1   | <i>Aquimarina macrocephali</i>            | WP_024771996.1 |
| 245 | WP_027419181.1   | <i>Crocinitomix catalasitica</i>          | WP_027419181.1 |
| 246 | WP_025667393.1   | <i>Aquimarina megaterium</i>              | WP_025667393.1 |
| 247 | WP_021644787.1   | <i>Bacteroides pyogenes</i>               | WP_021644787.1 |
| 248 | AGY53864.1       | <i>Bacteroidales bacterium CF</i>         | AGY53864.1     |
| 249 | WP_021071162.1   | <i>Sphingobacterium paucimobilis</i>      | WP_021071162.1 |
| 250 | WP_023847326.1   | <i>Porphyromonas gingivalis</i>           | WP_023847326.1 |
| 251 | WP_015215107.1   | <i>Anabaena cylindrica</i>                | WP_015215107.1 |



**Table S6: LuxR-like proteins used for the phylogenetic tree.** Sequences are ordered according to the phylogenetic tree from top to bottom.

|    | <b>Protein</b>                                                       | <b>Accession number</b> |
|----|----------------------------------------------------------------------|-------------------------|
| 1  | <i>P. chlororaphis</i> O6 LuxR-like III                              | WP_009050747.1          |
| 2  | <i>P. chlororaphis</i> subsp. <i>aurantiaca</i> PB-St2 LuxR-like II  | ETD40528.1              |
| 3  | <i>P. savastanoi</i> AhIR                                            | WP_004667792.1          |
| 4  | <i>P. corrugata</i> PcoR                                             | WP_024779118.1          |
| 5  | <i>V. fischeri</i> LuxR                                              | AAQ90208.1              |
| 6  | <i>V. paradoxus</i> EPS LuxR-like I                                  | WP_013543355.1          |
| 7  | <i>M. sp.</i> 4-46 LuxR-like I                                       | WP_012335163.1          |
| 8  | <i>H. baltica</i> ATCC 49814 LuxR-like I                             | WP_015826629.1          |
| 9  | <i>A. tumefaciens</i> TraR                                           | WP_010892389.1          |
| 10 | <i>P. fluorescens</i> PsoR                                           | WP_014717607.1          |
| 11 | <i>P. syringae</i> LuxRI                                             | WP_004656728.1          |
| 12 | <i>R. sp.</i> Y9602 LuxR-like I                                      | WP_013577865.1          |
| 13 | <i>S. meliloti</i> NesR                                              | WP_018096762.1          |
| 14 | <i>R. rubrum</i> LuxR-like I                                         | WP_011390028.1          |
| 15 | <i>X. campestris</i> XccR                                            | WP_011037943.1          |
| 16 | <i>X. campestris</i> LuxR-like I                                     | WP_011269597.1          |
| 17 | <i>X. oryzae</i> OryR                                                | AAR91700.1              |
| 18 | <i>X. axonopodis</i> XagR                                            | WP_029829276.1          |
| 19 | <i>P. fluorescens</i> MupR                                           | AAK28504.1              |
| 20 | <i>P. aeruginosa</i> LasR                                            | WP_003082999.1          |
| 21 | <i>P. putida</i> PpuR                                                | AAZ80478.1              |
| 22 | <i>P. aeruginosa</i> QscR                                            | WP_003160097.1          |
| 23 | <i>P. asymbiotica</i> PauR                                           | WP_015836138.1          |
| 24 | <i>P. luminescens</i> PluR                                           | WP_011148637.1          |
| 25 | <i>M. paludis</i> DSM 18603 LuxR-like I                              | WP_008504649.1          |
| 26 | <i>P. asymbiotica</i> LuxR-like II                                   | WP_012776445.1          |
| 27 | <i>P. asymbiotica</i> LuxR-like I                                    | WP_012776448.1          |
| 28 | <i>C. gingivalis</i> ATCC 33624 LuxR-like II                         | WP_002670238.1          |
| 29 | <i>F. psychrophilum</i> JIP02/86 LuxR-like I                         | WP_011963028.1          |
| 30 | <i>V. paradoxus</i> S110 LuxR-like I                                 | WP_015865859.1          |
| 31 | <i>P. sp.</i> GM17 PMI20 LuxR-like II                                | WP_007923195.1          |
| 32 | <i>P. aureofaciens</i> PhzR                                          | WP_009045585.1          |
| 33 | <i>P. chlororaphis</i> subsp. <i>aureofaciens</i> 30-84 LuxR-like II | WP_009045585.1          |
| 34 | <i>P. chlororaphis</i> O6 LuxR-like II                               | WP_009050817.1          |
| 35 | <i>P. chlororaphis</i> subsp. <i>aurantiaca</i> PB-St2 LuxR-like I   | WP_016703601.1          |
| 36 | <i>S. enterica</i> SdiA                                              | WP_001157166.1          |
| 37 | <i>P. aeruginosa</i> RhIR                                            | WP_004351224.1          |
| 38 | <i>P. aureofaciens</i> CsaR                                          | WP_009043433.1          |
| 39 | <i>P. chlororaphis</i> subsp. <i>aureofaciens</i> 30-84 LuxR-like I  | WP_009043433.1          |
| 40 | <i>P. sp.</i> GM17 PMI20 LuxR-like I                                 | WP_007923195.1          |
| 41 | <i>P. chlororaphis</i> O6 LuxR-like I                                | WP_009048517.1          |
| 42 | <i>P. chlororaphis</i> subsp. <i>aurantiaca</i> PB-St2 LuxR-like III | WP_023969002.1          |

**Table S7: Genome analysis of 116 *darB* containing bacterial species or strains, regarding structure and assembly of the *darABC* operon, and the presence of *luxR* and *luxI* genes.**

| Strain                                         | <i>darA</i>          | <i>darB</i>          | <i>darC</i>          | <i>luxR</i>                                                       | <i>luxI</i> |
|------------------------------------------------|----------------------|----------------------|----------------------|-------------------------------------------------------------------|-------------|
| <i>Aequorivita capsosiphonis</i> DSM 23843     | ORF 301 (scaffold7)  | ORF 302 (scaffold7)  | ORF 313 (scaffold7)  | ORF 19 (scaffold15)                                               |             |
| <i>Aequorivita sublithincola</i> DSM 14238     | Aeqsu_0933           | Aeqsu_0932           | Aeqsu_0921           | Aeqsu_1957                                                        |             |
| <i>Aggregatibacter aphrophilus</i> ATCC 33389  | ATCC33389_0195       | ATCC33389_0196       | ATCC33389_0162       |                                                                   |             |
| <i>Aggregatibacter aphrophilus</i> F0387       | HMPREF9335_01584     | HMPREF9335_01583     | HMPREF9335_01616     |                                                                   |             |
| <i>Aggregatibacter aphrophilus</i> NJ8700      | NT05HA_1736          | NT05HA_1737          | NT05HA_1701          |                                                                   |             |
| <i>Aggregatibacter segnis</i> ATCC 33393       | HMPREF9064_0175      | HMPREF9064_0174      | HMPREF9064_0152      |                                                                   |             |
| <i>Albidiferax ferrireducens</i> T118          | Rfer_3975            | Rfer_3974            | Rfer_3980            |                                                                   |             |
| <i>Anabaena cylindrica</i> PCC 7122            | Anacy_3063           | Anacy_3064           |                      |                                                                   |             |
| <i>Aquimarina latercula</i> 2041               | ORF 311 (scaffold10) | ORF 312 (scaffold10) | ORF 321 (scaffold10) |                                                                   |             |
| <i>Aquimarina macrocephali</i> JAMB N27        | ORF 69 (scaffold20)  | ORF 70 (scaffold20)  | ORF 81 (scaffold20)  | ORF 01 (scaffold04);<br>ORF 15 (scaffold24);<br>ORF 1 (scaffold6) |             |
| <i>Aquimarina megaterium</i> XH134             | ORF 15 (scaffold24)  | ORF 16 (scaffold24)  | ORF 27 (scaffold24)  | ORF 232 (scaffold10)                                              |             |
| <i>Aquimarina muelleri</i> DSM 19832           | ORF 47 (scaffold19)  | ORF 48 (scaffold19)  | ORF 58 (scaffold19)  |                                                                   |             |
| <i>Arcobacter butzleri</i> JV22                | HMPREF9401_0243      | HMPREF9401_0244      | HMPREF9401_0261      | HMPREF9401_1717                                                   |             |
| <i>Arcobacter nitrofigilis</i> DSM 7299        | Arnit_2309           | Arnit_2310           | Arnit_2315           |                                                                   |             |
| <i>Azoarcus</i> sp. BH72                       | azo0293              | azo0292              | azo0285              | azo0648                                                           |             |
| <i>Bacteroidales bacterium</i> CF              | BRDCF_p1238          | BRDCF_p1237          | BRDCF_p1232          | BRDCF_p1580                                                       |             |
| <i>Bacteroides pyogenes</i> F0041              | HMPREF1981_00060     | HMPREF1981_00061     |                      | HMPREF1981_00004;<br>HMPREF1981_02474;<br>HMPREF1981_02785        |             |
| <i>Bacteroidetes</i> oral taxon 274 str. F0058 | ORF 67 (scaffold16)  | ORF 68 (scaffold16)  | ORF 53 (scaffold15)  |                                                                   |             |
| <i>Bizionia argentinensis</i> JUB59            | BZARG_2046           | BZARG_2045           | BZARG_2034           |                                                                   |             |
| <i>Capnocytophaga gingivalis</i> ATCC 33624    | CAPGI0001_2416       | CAPGI0001_0843       | CAPGI0001_0776       |                                                                   |             |
| <i>Capnocytophaga ochracea</i> F0287           | HMPREF1977_1455      | HMPREF1977_1456      | HMPREF1977_1722      | HMPREF1977_1768;<br>HMPREF1977_2169                               |             |
| <i>Capnocytophaga ochracea</i> str. Holt 25    | HMPREF1319_0373      | HMPREF1319_0374      | HMPREF1319_0525      | HMPREF1319_0572;                                                  |             |

|                                                           |                     |                     |                     |                                             |                                 |
|-----------------------------------------------------------|---------------------|---------------------|---------------------|---------------------------------------------|---------------------------------|
|                                                           |                     |                     |                     | HMPREF1319_0952                             |                                 |
| <i>Capnocytophaga s p. CM59</i>                           | HMPREF1154_0138     | HMPREF1154_2288     | HMPREF1154_0352     | HMPREF1154_2343                             |                                 |
| <i>Capnocytophaga s p. oral taxon 335 str . F0486</i>     | HMPREF1320_1700     | HMPREF1320_1701     | HMPREF1320_1086     | HMPREF1320_2182                             |                                 |
| <i>Capnocytophaga s p. oral taxon 338 str . F0234</i>     | HMPREF9071_1849     | HMPREF9071_0527     | HMPREF9071_0335     |                                             |                                 |
| <i>Capnocytophaga s p. oral taxon 412 str . F0487</i>     | HMPREF1321_1155     | MHPREF1321_1154     | HMPREF1321_2121     |                                             |                                 |
| <i>Capnocytophaga s putigena ATCC 336 12</i>              | CAPSP0001_1213      | CAPSP0001_1216      | CAPSP0001_1050      | CAPSP0001_1718;<br>CAPSP0001_0637           |                                 |
| <i>Chryseobacterium daeguense 19338</i>                   | ORF 333 (scaffold2) | ORF 334 (scaffold2) | ORF 300 (scaffold2) |                                             |                                 |
| <i>Chryseobacterium gleum ATCC 35910</i>                  | HMPREF0204_10986    | HMPREF0204_10987    | HMPREF0204_10997    | HMPREF0204_11867;<br>HMPREF0204_14208       |                                 |
| <i>Chryseobacterium sp. CF314</i>                         | PMI13_02464         | PMI13_02465         | PMI13_02475         | PMI13_01931;<br>PMI13_02863;<br>PMI13_03175 |                                 |
| <i>Chryseobacterium sp. UNC8MFCol</i>                     | ORF 12 (scaffold21) | ORF 13 (scaffold21) | ORF23 (scaffold21)  | ORF 4 (scaffold7)                           |                                 |
| <i>Myroides odoratus DSM 2801</i>                         | Myrod_1724          | Myrod_1723          | Myrod_1713          | Myrod_0136                                  |                                 |
| <i>Pseudomonas chlororaphis subsp. aureofaciens 30-84</i> | Pchl3084_3968       | Pchl3084_3967       | Pchl3084_0478       | Pchl3084_3130                               | Pchl3084_2449;<br>Pchl3084_4949 |
| <i>Dechloromonas aromatica RCB</i>                        | Daro_2367           | Daro_2368           | Daro_2373           | Daro_3200                                   |                                 |
| <i>Cytophaga hutchinsonii ATCC 33406</i>                  | CHU_0391            | CHU_0390            | CHU_0385            |                                             |                                 |
| <i>Flavobacterium johnsoniae UW101</i>                    | Fjoh_1103           | Fjoh_1102           | Fjoh_1089           | Fjoh_0173;<br>Fjoh_4220                     |                                 |
| <i>Methylobacterium sp. 4-46</i>                          | M446_0173           | M446_0174           |                     |                                             | M446_5461                       |
| <i>Dyadobacter fermentans DSM 18053</i>                   | Dfer_5796           | Dfer_5797           | Dfer_5802           |                                             |                                 |
| <i>Hirschia baltica ATCC 49814</i>                        | Hbal_2903           | Hbal_2902           | Hbal_1310           | Hbal_0785                                   | Hbal_1825                       |
| <i>Chitinophaga pinensis DSM 2588</i>                     | Cpin_6851           | Cpin_6850           | Cpin_6845           | Cpin_0098                                   |                                 |
| <i>Sulfurospirillum deleyianum DSM 6946</i>               | Sdel_2119           | Sdel_2118           | Sdel_2124           | Sdel_0795                                   |                                 |
| <i>Desulfurivibrio alkaliphilus AHT2</i>                  | DaAHT2_0003         | DaAHT2_1139         | DaAHT2_1123         |                                             |                                 |
| <i>Sideroxydans lithotrophicus ES-1</i>                   | Slit_0358           | Slit_0359           | Slit_0354           |                                             |                                 |
| <i>Leadbetterella byssophila DSM 17132</i>                | Lbys_1509           | Lbys_1508           | Lbys_1496           |                                             |                                 |
| <i>Variovorax paradoxus EPS</i>                           | Varpa_2230          | Varpa_2231          | Varpa_3239          | Varpa_4471                                  |                                 |
| <i>Weeksella virosa DSM 16922</i>                         | Weevi_1553          | Weevi_1554          | Weevi_1564          |                                             |                                 |
| <i>Fluviicola taffensis DSM 16823</i>                     | Fluta_1446          | Fluta_1447          | Fluta_1439          | Fluta_3823                                  |                                 |
| <i>Pseudomonas</i>                                        | MDS_0596            | MDS_0597            | MDS_0627            |                                             |                                 |

|                                             |                       |                       |                       |                                             |  |
|---------------------------------------------|-----------------------|-----------------------|-----------------------|---------------------------------------------|--|
| <i>mendocina</i> NK-01                      |                       |                       |                       |                                             |  |
| <i>Pseudomonas fulva</i> 12-X               | Psefu_0434            | Psefu_0435            | Psefu_0465            | Psefu_1602                                  |  |
| <i>Lacinutrix</i> sp. 5H-3-7-4              | Lacal_2073            | Lacal_2074            | Lacal_2084            | Lacal_2230                                  |  |
| <i>Owenweeksia hongkongensis</i> DSM 17368  | Oweho_0890            | Oweho_0889            | Oweho_0884            | Oweho_3240                                  |  |
| <i>Tannerella forsythia</i> ATCC 43037      | BFO_3186              | BFO_3187              | BFO_1316              | BFO_1146;<br>BFO_1208;<br>BFO_2702          |  |
| <i>Flavobacterium columnare</i> ATCC 49512  | FCOL_11850            | FCOL_11845            | FCOL_11795            | FCOL_05485                                  |  |
| <i>Sulfurospirillum barnesii</i> SES-3      | Sulba_2258            | Sulba_2257            | Sulba_2250            |                                             |  |
| <i>Pseudomonas stutzeri</i> DSM 10701       | PSJM300_17950         | PSJM300_17948         | PSJM300_02845         | PSJM300_17705                               |  |
| <i>Nocardia brasiliensis</i> ATCC 700358    | O3I_010630            | O3I_010635            | O3I_022670            | O3I_041485                                  |  |
| <i>Niabella soli</i> DSM 19437              | NIASO_13195           | NIASO_13200           | NIASO_13500           |                                             |  |
| <i>Desulfotalea psychrophila</i> LSv54      | DP3069                | DP1817                | DP1850                |                                             |  |
| <i>Crocinitomix catalasitica</i> ATCC 23190 | ORF 8 (scaffold9)     | ORF 10 (scaffold9)    | ORF 15 (scaffold9)    | ORF 14 (scaffold44);<br>ORF 34 (scaffold18) |  |
| delta proteobacterium MLMS-1                | MldDRAFT_3884         | MldDRAFT_4065         | MldDRAFT_3849         |                                             |  |
| <i>Dyadobacter alkalitolerans</i> DSM 23607 | ORF 397 (scaffold12)  | ORF 398 (scaffold12)  | ORF 404 (scaffold12)  | ORF 30 (scaffold4);<br>ORF 1064 (scaffold3) |  |
| <i>Dyadobacter beijingensis</i> DSM 21582   | ORF 2247 (scaffold10) | ORF 2248 (scaffold10) | ORF 2257 (scaffold10) | ORF 3107 (scaffold6)                        |  |
| <i>Eikenella corrodens</i> ATCC 23834       | EIKCOROL_00268        | EIKCOROL_00456        | EIKCOROL_02337        |                                             |  |
| <i>Empedobacter brevis</i> NBRC 14943       | ORF 80 (scaffold27)   | ORF 81 (scaffold27)   | ORF 91 (scaffold27)   | ORF 195 (scaffold32)                        |  |
| <i>Epilithonimonas tenax</i> DSM 16811      | ORF 189 (scaffold2)   | ORF 190 (scaffold2)   | ORF 201 (scaffold2)   |                                             |  |
| <i>Fischerella muscicola</i> PCC 7414       | ORF 27 (scaffold177)  | ORF 26 (scaffold177)  | ORF 12 (scaffold174)  |                                             |  |
| <i>Fischerella</i> sp. JSC-11               | FJSC11DRAFT_3961      | FJSC11DRAFT_3962      |                       |                                             |  |
| <i>Flavobacterium cauense</i> R2A-7         | FCR2A7T_13120         | FCR2A7T_13110         | FCR2A7T_13220         |                                             |  |
| <i>Flavobacterium enshiense</i> DK69        | FEDK69T_11700         | FEDK69T_11690         | FEDK69T_11800         |                                             |  |
| <i>Flavobacterium saliperosum</i> S13       | FSS13T_06230          | FSS13T_06240          | FSS13T_06130          |                                             |  |
| <i>Flavobacterium</i> sp. CF136             | PMI10_02641           | PMI10_02642           | PMI10_02631           |                                             |  |
| <i>Flavobacterium</i> sp. F52               | FF52_12311            | FF52_12316            | FF52_12246            | FF52_06255;<br>FF52_17533                   |  |
| <i>Flavobacterium</i> sp. JGI 0001001-D01   | ORF 24 (scaffold76)   | ORF 23 (scaffold76)   | ORF 37 (scaffold76)   |                                             |  |
| <i>Flavobacterium</i> sp. KJJ               | ORF 830 (scaffold2)   | ORF 829 (scaffold2)   | ORF 842 (scaffold2)   |                                             |  |
| <i>Flavobacterium</i> sp. WG21              | ORF 98 (scaffold15)   | ORF 97 (scaffold15)   | ORF 108 (scaffold15)  |                                             |  |
| <i>Flavobacterium</i>                       | ORF 88                | ORF 89                | ORF 98                | ORF 94                                      |  |

|                                                                           |                        |                        |                        |                                                                                                                                        |  |
|---------------------------------------------------------------------------|------------------------|------------------------|------------------------|----------------------------------------------------------------------------------------------------------------------------------------|--|
| <i>subsaxonicum</i><br>DSM 21790                                          | (scaffold7)            | (scaffold7)            | (scaffold7)            | (scaffold27)                                                                                                                           |  |
| <i>Flavobacterium</i><br><i>suncheonense</i><br>DSM 17707                 | ORF 186<br>(scaffold8) | ORF 187<br>(scaffold8) | ORF 192<br>(scaffold8) |                                                                                                                                        |  |
| <i>Haemophilus parai</i><br><i>nfluenzae</i> ATCC 33<br>392               | HMPREF9417<br>_0596    | HMPREF9417<br>_0595    | HMPREF9417<br>_0582    |                                                                                                                                        |  |
| <i>Haemophilus pittma</i><br><i>niae</i> HK 85                            | HMPREF9952<br>_1825    | HMPREF9952<br>_1824    | HMPREF9952<br>_0565    |                                                                                                                                        |  |
| <i>Kingella oralis</i> ATC<br>C 51147                                     | GCWU000324<br>_02598   | GCWU000324<br>_02596   | GCWU000324<br>_02637   |                                                                                                                                        |  |
| <i>Mannheimia haemo</i><br><i>lytica</i> serotype A2 s<br>tr. BOVINE      | COK_0380               | COK_0379               |                        |                                                                                                                                        |  |
| <i>Mannheimia haemo</i><br><i>lytica</i> serotype A2 s<br>tr. OVINE       | COI_2001               | COI_2002               |                        |                                                                                                                                        |  |
| <i>Microcystis aerugin</i><br><i>osa</i> PCC 9808                         | MICAG_18200<br>12      | MICAG_18200<br>11      |                        |                                                                                                                                        |  |
| <i>Mucilaginibacter pal</i><br><i>udis</i> DSM 18603                      | ORF 765<br>(scaffold7) | ORF 766<br>(scaffold7) | ORF 773<br>(scaffold7) | ORF 1985<br>(scaffold1);<br>ORF 5836<br>(scaffold3);<br>ORF 387<br>(scaffold7);<br>ORF 1150<br>(scaffold1);<br>ORF 1558<br>(scaffold1) |  |
| <i>Myroides odoratimi</i><br><i>mus</i> CCUG 3837                         | HMPREF9711<br>_01695   | HMPREF9711<br>_01694   | HMPREF9711<br>_01697   | HMPREF9711<br>_03085                                                                                                                   |  |
| <i>Myroides odoratimi</i><br><i>mus</i> CCUG 10230                        | HMPREF9712<br>_01160   | HMPREF9712<br>_01161   | HMPREF9712<br>_01158   | HMPREF9712<br>_02855                                                                                                                   |  |
| <i>Myroides odoratimi</i><br><i>mus</i> CIP 103059                        | HMPREF9716<br>_01580   | HMPREF9716<br>_01579   | HMPREF9716<br>_01569   | HMPREF9716<br>_00125;<br>HMPREF9716<br>_01207                                                                                          |  |
| <i>Photorhabdus</i><br><i>luminescens</i> subsp.<br><i>laumondii</i> TTO1 | Plu2163                | Plu2164                | Plu2165                | Plu0320;<br>Plu1817;<br>Plu4562;<br>Plu4274;<br>Plu4288                                                                                |  |
| <i>Porphyromonas</i><br><i>gingivalis</i> ATCC<br>33277                   |                        | PGN_0189               |                        | PGN_1373                                                                                                                               |  |
| <i>Capnocytophaga</i><br><i>ochracea</i> DSM<br>7271                      | Coch_0548              | Coch_0547              | Coch_0744              |                                                                                                                                        |  |
| <i>Zobellia</i><br><i>galactanivorans</i>                                 | zobelia_2075           | zobelia_2074           | zobelia_2064           | zobelia_3220                                                                                                                           |  |
| <i>Neisseria flavescen</i><br><i>s</i> NRL30031/H210                      | NEIFLAOT_02<br>525     | NEIFLAOT_02<br>523     | NEIFLAOT_01<br>589     |                                                                                                                                        |  |
| <i>Neisseria flavescen</i><br><i>s</i> SK114                              | NEIFL0001_0<br>039     | NEIFL0001_0<br>036     | NEIFL0001_1<br>239     |                                                                                                                                        |  |
| <i>Neisseria macacae</i><br>ATCC 33926                                    | HMPREF9418<br>_1131    | HMPREF9418<br>_1128    | HMPREF9418<br>_1115    |                                                                                                                                        |  |
| <i>Neisseria mucosa</i><br>C102                                           | HMPREF0604<br>_01365   | HMPREF0604<br>_01363   | HMPREF0604<br>_01385   |                                                                                                                                        |  |
| <i>Neisseria shayegan</i><br><i>ii</i> 871                                | HMPREF9371<br>_1041    | HMPREF9371<br>_1043    | HMPREF9371<br>_1824    |                                                                                                                                        |  |
| <i>Neisseria sicca</i> AT<br>CC 29256                                     | NEISICOT_02<br>135     | NEISICOT_02<br>133     | NEISICOT_02<br>128     |                                                                                                                                        |  |
| <i>Neisseria sicca</i> VK<br>64                                           | HMPREF1051<br>_1746    | HMPREF1051<br>_1749    | HMPREF1051<br>_1674    |                                                                                                                                        |  |
| <i>Neisseria sp.</i> GT4A<br>CT1                                          | HMPREF1028<br>_00832   | HMPREF1028<br>_00835   | HMPREF1028<br>_00840   |                                                                                                                                        |  |

|                                                                 |                       |                       |                       |                                                                                             |                                             |
|-----------------------------------------------------------------|-----------------------|-----------------------|-----------------------|---------------------------------------------------------------------------------------------|---------------------------------------------|
| <i>Neisseria</i> sp. oral taxon 014 str. F0314                  | ORF 66 (scaffold20)   | ORF 70 (scaffold20)   | ORF 82 (scaffold20)   |                                                                                             |                                             |
| <i>Neisseria subflava</i> NJ9703                                | NEISUBOT_03198        | NEISUBOT_03200        | NEISUBOT_03174        |                                                                                             |                                             |
| <i>Neisseria wadsworthii</i> 9715                               | HMPREF9370_1915       | HMPREF9370_1914       | HMPREF9370_1926       |                                                                                             |                                             |
| <i>Niabella aurantiaca</i> DSM 17617                            | ORF 726 (scaffold5)   | ORF 727 (scaffold5)   | ORF 1151 (scaffold5)  |                                                                                             |                                             |
| <i>Photorhabdus asymbiotica</i>                                 | PAU_02402             | PAU_02401             | PAU_02400             | PAU_00252;<br>PAU_00255;<br>PAU_00467;<br>PAU_03807;<br>PAU_04062                           |                                             |
| <i>Pseudoalteromonas arctica</i> A 37-1-2                       | PARC_10984            | PARC_10989            | PARC_10954            | PARC_05648;<br>PARC_16911;<br>PARC_133373                                                   |                                             |
| <i>Pseudoalteromonas spongiae</i> UST010 723-006                | PSPO_03655            | PSPO_03650            | PSPO_03675            | PSPO_01321;<br>PSPO_02000;<br>PSPO_07959                                                    |                                             |
| <i>Pseudomonas chlororaphis</i> O6                              | Pchl06_4244           | Pchl06_4243           | Pchl06_0482           | Pchl06_2663;<br>Pchl06_3394;<br>Pchl06_3471                                                 | Pchl06_2661;<br>Pchl06_5139;<br>Pchl06_5218 |
| <i>Pseudomonas chlororaphis</i> subsp. <i>aurantiaca</i> PB-St2 | U724_29720            | U724_29715            | U724_27995            | U724_04375;<br>U724_04815;<br>U724_20385                                                    | U724_20380;<br>U724_10400;<br>U724_10750    |
| <i>Pseudomonas</i> sp. GM17                                     | PMI20_00701           | PMI20_00702           | PMI20_03176           | PMI20_01529;<br>PMI20_02078;<br>PMI20_05272                                                 | PMI20_1530;<br>PMI20_01270                  |
| <i>Sphingobacterium paucimobilis</i> HER 1398                   | M472_06765            | M472_06770            | M472_06820            | M472_18005                                                                                  |                                             |
| <i>Sporocytophaga myxococcoides</i> DSM 11118                   | ORF 3606 (scaffold6)  | ORF 3608 (scaffold6)  | ORF 3630 (scaffold6)  | ORF 16 (scaffold13);<br>ORF 55 (scaffold13);<br>ORF 573 (scaffold5);<br>ORF 852 (scaffold2) |                                             |
| <i>Terrimonas ferruginea</i> DSM 30193                          | ORF 2536 (scaffold10) | ORF 2540 (scaffold10) | ORF 2558 (scaffold10) |                                                                                             |                                             |
| <i>Variovorax paradoxus</i> S110                                | Vapar_3390            | Vapar_3389            | Vapar_2669            |                                                                                             | Vapar_5808                                  |
| <i>Variovorax</i> sp. CF313                                     | PMI12_02024           | PMI12_02025           | PMI12_0548            | PMI12_00090                                                                                 |                                             |
| <i>Sulfurimonas gotlandica</i> GD1                              | SMGD1_1387            | SMGD1_1386            | SMGD1_1381            |                                                                                             |                                             |
| <i>F. psychrophilum</i> JIP02/86                                | FP2280                | FP2279                | FP2267                |                                                                                             |                                             |

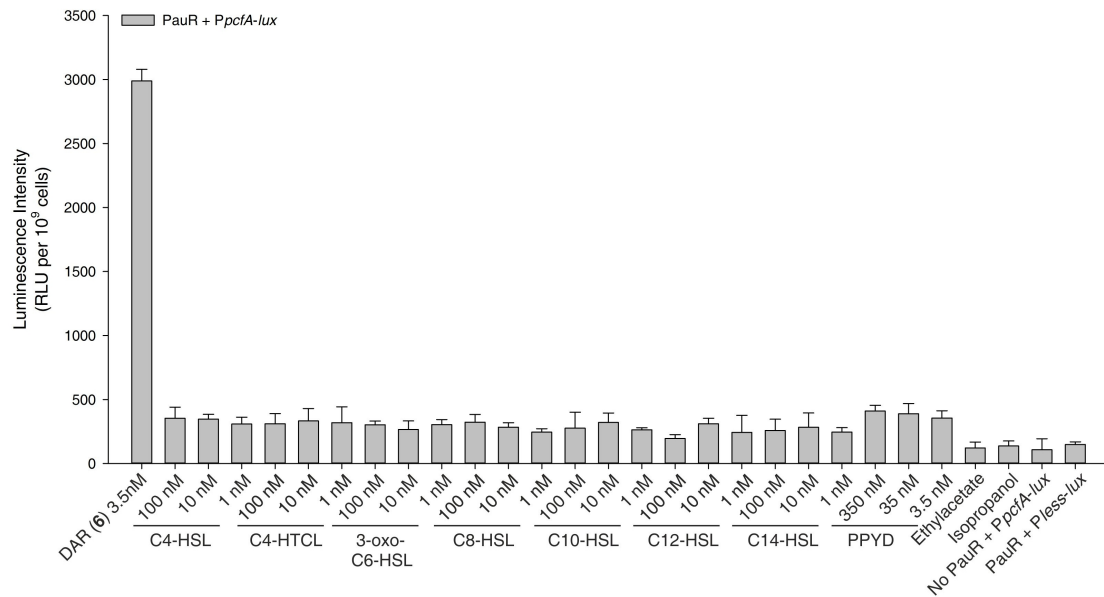

**Fig. S1: PauR neither senses exogenous PPYs nor exogenous AHLs.** PauR does not sense different acyl-homoserinelactones or photopyrones (PPYD), but most specifically senses 2,5-dialkylresorcinol (DAR (6)). *E. coli* LMG194 strains harbouring a *P<sub>pcfA</sub>-luxCDABE* (*P<sub>pcfA</sub>-lux*) fusion as well as pBAD-*pauR* were cultivated, and exposed to 3.5 nM PPYD, to N-butyryl-DL-homoserinelactone (C4-HSL), N-butyryl-DL-homocysteinthiolactone (C4-HCTL), N-3-oxo-hexanoyl-DL-homoserinelactone (3-oxo-C6-HSL), N-octanoyl-DL-homoserinelactone (C8-HSL), N-decanoyl-DL-homoserinelactone (C10-HSL), N-dodecanoyl-DL-homoserinelactone (C12-HSL), and N-tetradecanoyl-DL-homoserinelactone (C14-HSL), respectively, in concentrations of 1 nM, 10 nM, and 100 nM, respectively. As negative controls isopropanol and ethylacetate and as positive control 3.5 nM DAR (6) was added to the *E. coli* LMG194 cells harbouring a *P<sub>pcfA</sub>-luxCDABE* (*P<sub>pcfA</sub>-lux*) fusion as well as pBAD-*pauR*. Cells with no PauR or cells harbouring a *luxCDABE* operon without a promoter (*P<sub>less</sub>*) were used as controls as well. Error bars represent standard deviation of at least three independently performed experiments. RLU, relative light units.

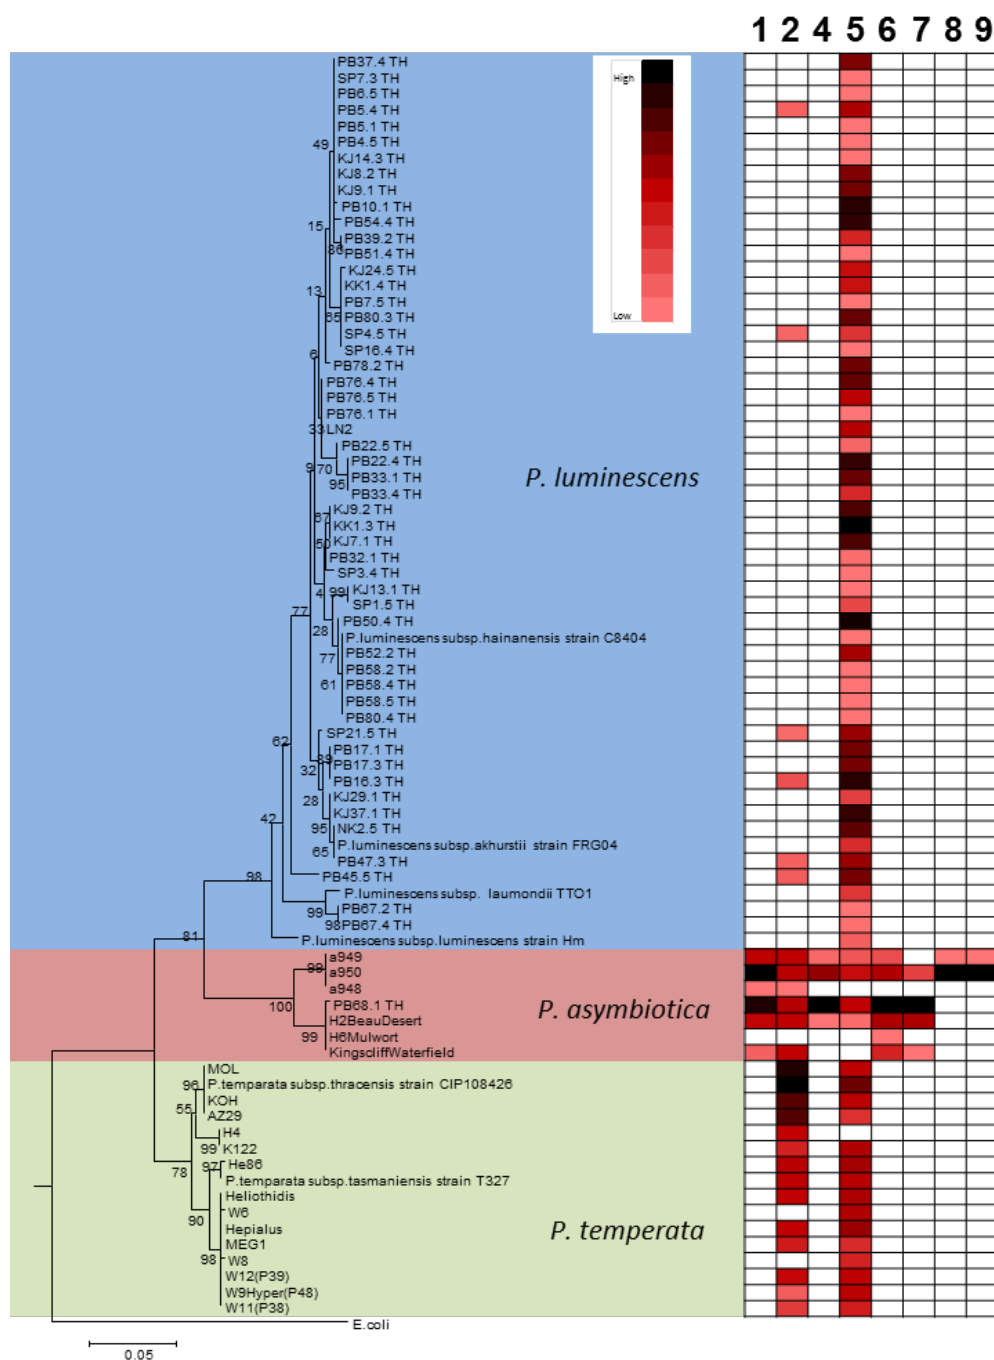

**Fig. S2: Phylogeny of different *Photorhabdus* strains and their production of CHD and DAR derivatives.** Numbers refer to structures in Fig. 1C. Compound 3 (missing in this figure) is only produced in trace amounts in *P. asymbiotica* strains and is only visible after derivatisation (17).



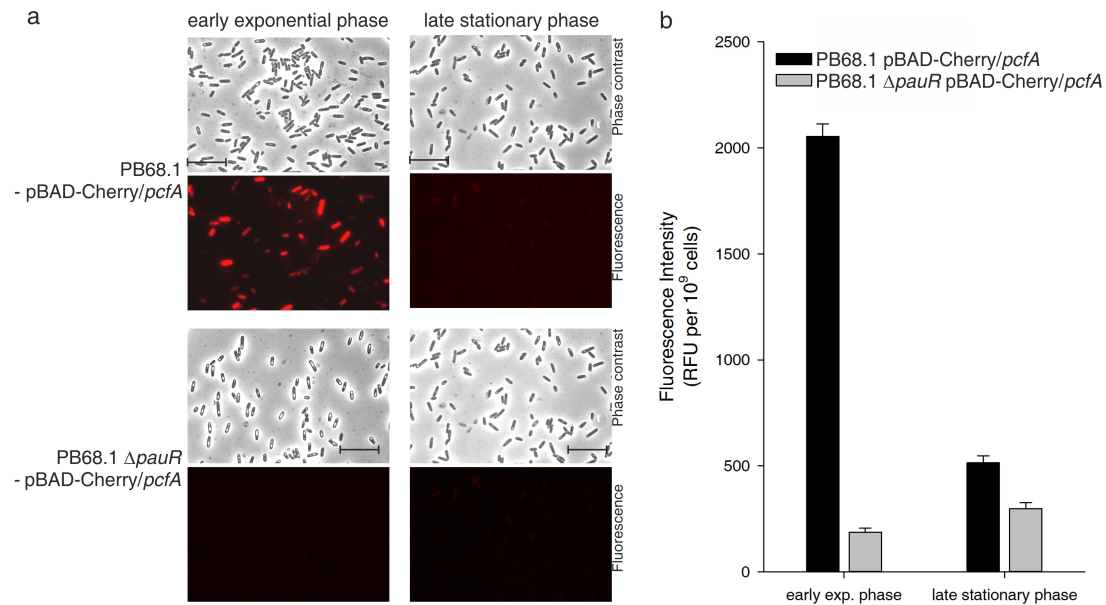

**Fig. S3: Growth phase dependent  $P_{pcfA}$  promoter activity in *P. asymbiotica*.** Strains *P. asymbiotica* PB68.1 and *P. asymbiotica* PB68.1  $\Delta$ *pauR* carrying plasmid pBAD-Cherry/*pcfA* were cultivated, and after 16 h (early exponential phase) as well as 48 h (late stationary phase) microscopically analyzed for fluorescence. **(a)** Upper picture: phase contrast channel; lower picture: fluorescence channel (excitation wavelength: 546 nm). The figure represents one characteristic of at least three independently performed experiments. Fluorescence was quantified **(b)** using an “Infinite 500” plate fluorimeter. Error bars represent standard deviations of at least three independently performed experiments. RFU=relative fluorescence units.

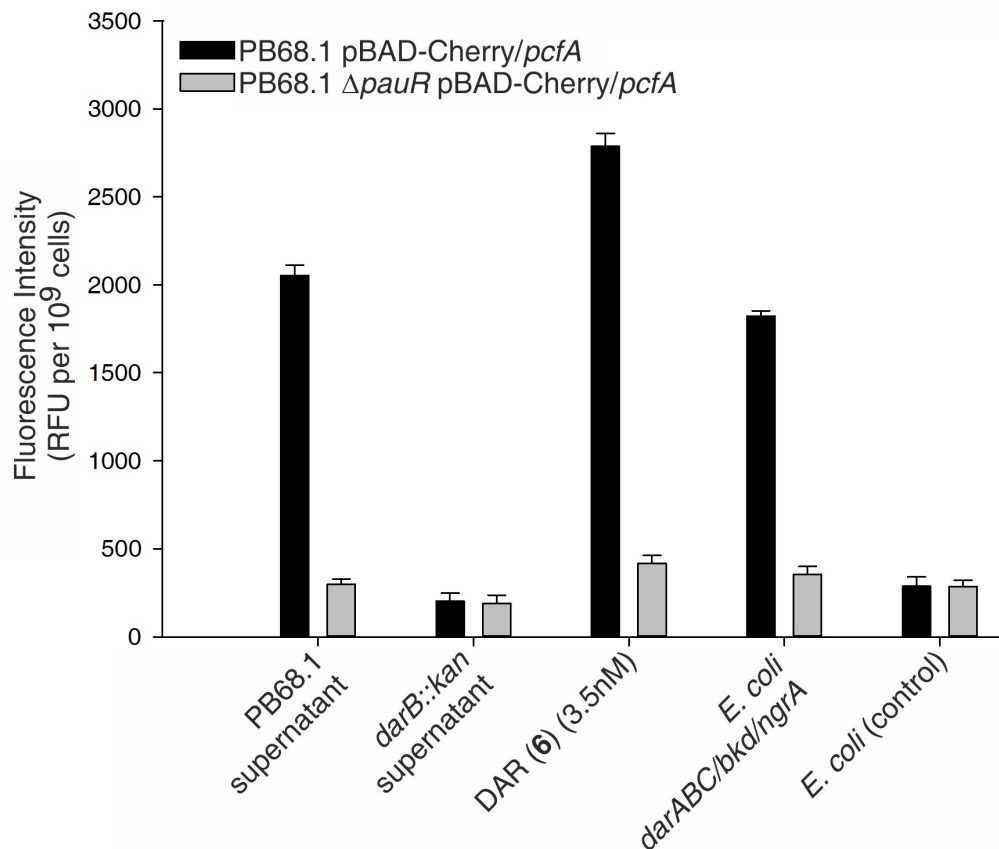

**Fig. S4: Dialkylresorcinol bioactivity.** *P. asymbiotica* strain PB68.1 carrying plasmid pBAD-Cherry/*pcfA* from the late stationary growth phase ( $P_{pcfA}$  promoter activity is almost off) was exposed to different extracts (PB68.1 supernatant, PB68.1 *darB::kan* supernatant, *E. coli* LMG194 expressing *darABC/bkd/ngrA* and *E. coli* LMG194 harbouring empty plasmids) or pure compounds **6** and then analyzed for fluorescence in a fluorimeter. Fluorescence was quantified using an “Infinite 500” plate fluorimeter. Error bars represent standard deviations of at least three independently performed experiments. RFU=relative fluorescence units.

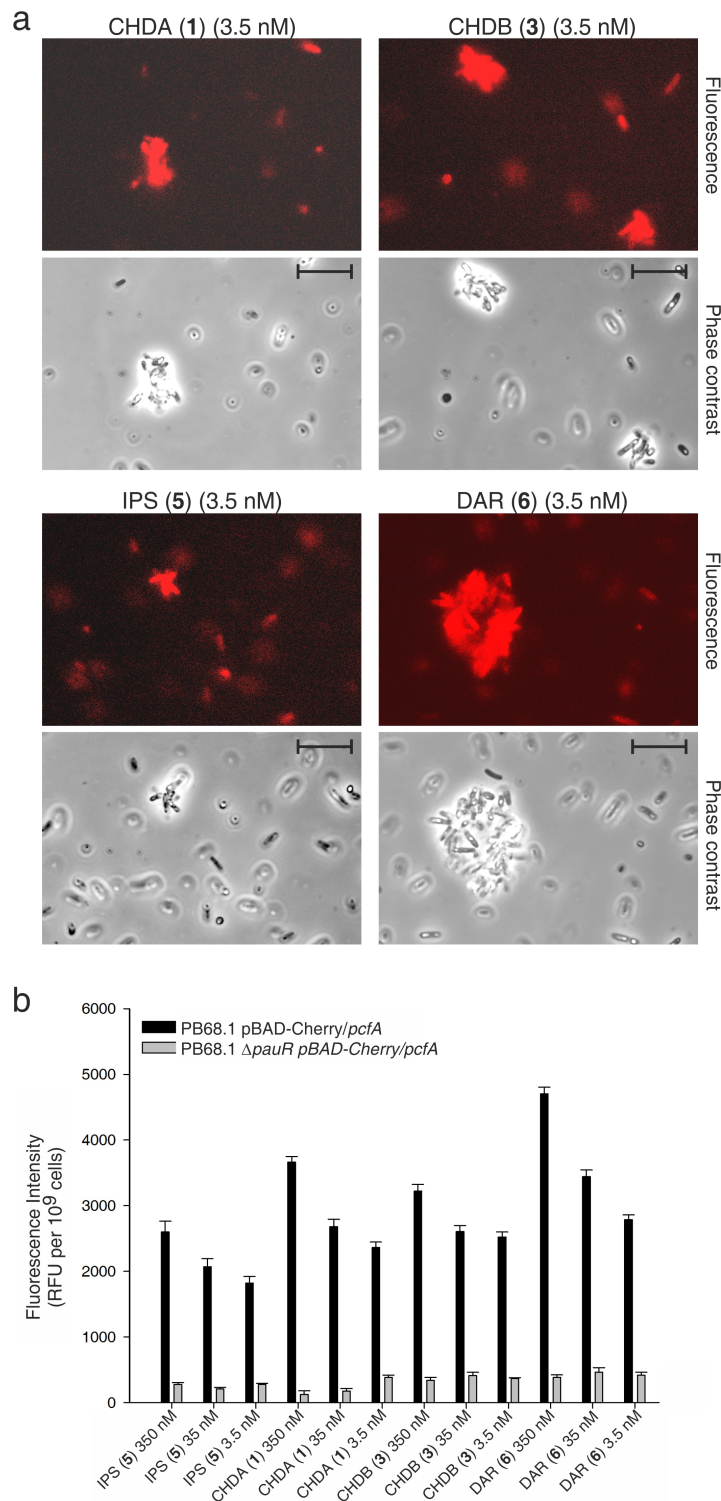

**Fig. S5: Concentration-dependent  $P_{pcfA}$  induction by CHDs and DARs.** *P. asymbiotica* PB68.1 strain carrying plasmid pBAD-Cherry/*pcfA* from the late stationary growth phase ( $P_{pcfA}$  promoter activity is almost off) was exposed to 350 nM, 35 nM, or 3.5 nM of **1**, **3**, **5**, and **6**, respectively. After incubation for 1 h at 37°C, fluorescence and cell clumping of the cells was analyzed in the microscope (**a**) and fluorescence was quantified using an “Infinite 500” (Tecan, Austria) plate fluorimeter (**b**). In (**a**) only concentrations of 3.5 nM of DARs and CHDs are shown. The bars indicate a scale of 10  $\mu$ m. The figure represents one characteristic of at least three independently performed experiments. Error bars in (**b**) represent standard deviation of at least three independently performed experiments. RFU=relative fluorescence units.

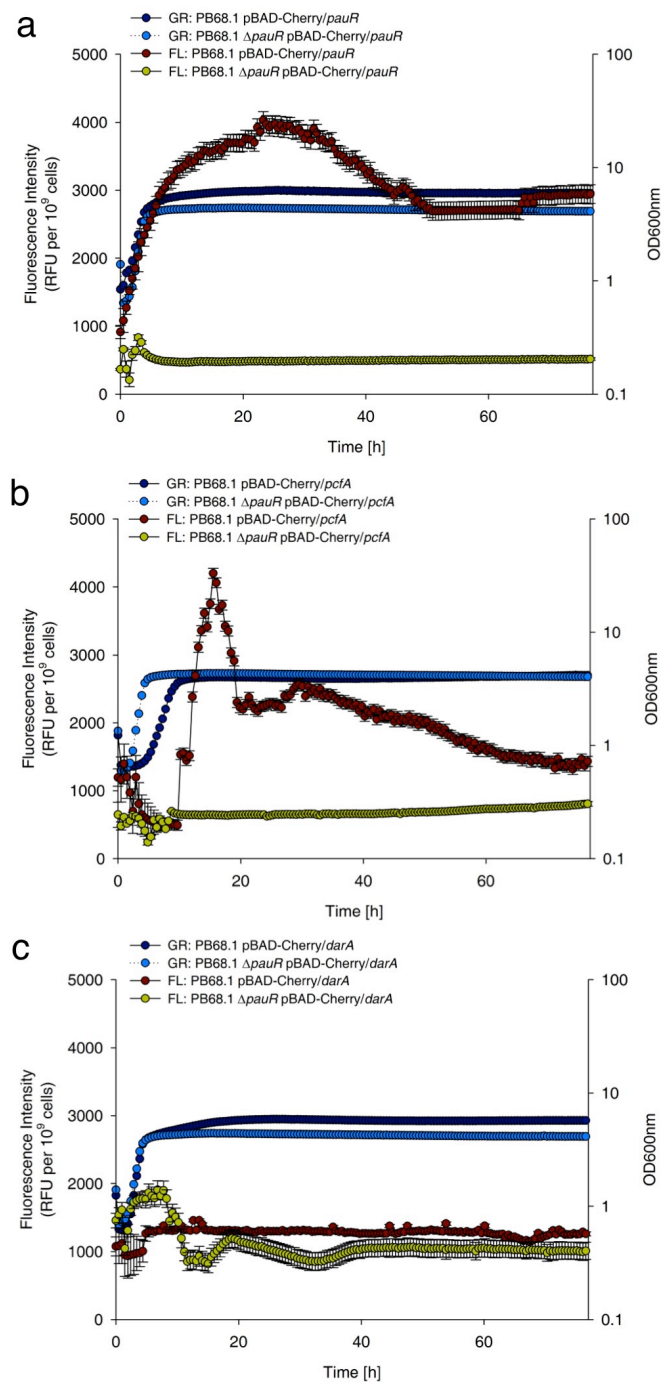

**Fig. S6: Growth-curve dependent  $P_{pauR}$ ,  $P_{pcfA}$ , and  $P_{darA}$  promoter activities in *P. asymbiotica* wild-type and *P. asymbiotica*  $\Delta$ pauR.** *P. asymbiotica* PB68.1 or *P. asymbiotica* PB68.1  $\Delta$ pauR carrying plasmid pBAD-Cherry/pauR (a), pBAD-Cherry/pcfA (b), or pBAD-Cherry/darA (c), respectively, was aerobically grown at 37°C for 70 hours. The growth curve (GR) was measured for each strain and fluorescence (FL) using an “Infinite 500” (Tecan, Austria) plate fluorimeter was quantified for each strain. Error bars represent the standard deviation of at least three independently performed experiments. RFU=relative fluorescence units.

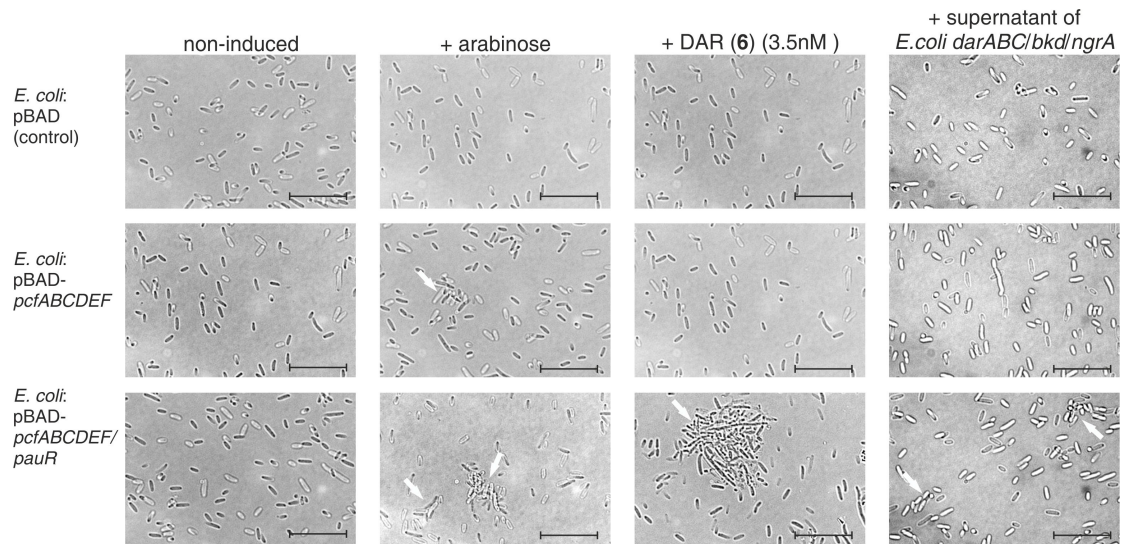

**Fig. S7: Heterologous reconstruction of the DarABC/PauR cell-cell communication circuit in *E. coli*.** *E. coli* LMG194 cells carrying plasmid pBAD24, pBAD-*pcfABCDE* or pBAD-*pcfABCDE/pauR* were cultivated, expression of the *pcfABCDE* operon was induced by addition of 0.2% (w/v) arabinose or via the native promoter with 3.5 nM of **6**, and cells were analyzed for clumping by phase contrast microscopy. Additionally *E. coli* LMG194 cells carrying plasmid pBAD24, pBAD-*pcfABCDE* or pBAD-*pcfABCDE/pauR* was incubated with the supernatant of *E. coli* cells carrying *darABC/bkdABC* and *ngrA*, expression was induced with 0.2% (w/v) arabinose and 1 mM Isopropyl  $\beta$ -D-1-thiogalactopyranoside (IPTG). Then, cells were analyzed for cell clumping (see white arrows) by phase contrast microscopy. Figures represent one of at least three independently performed experiments. Scale bars, 20  $\mu$ m.

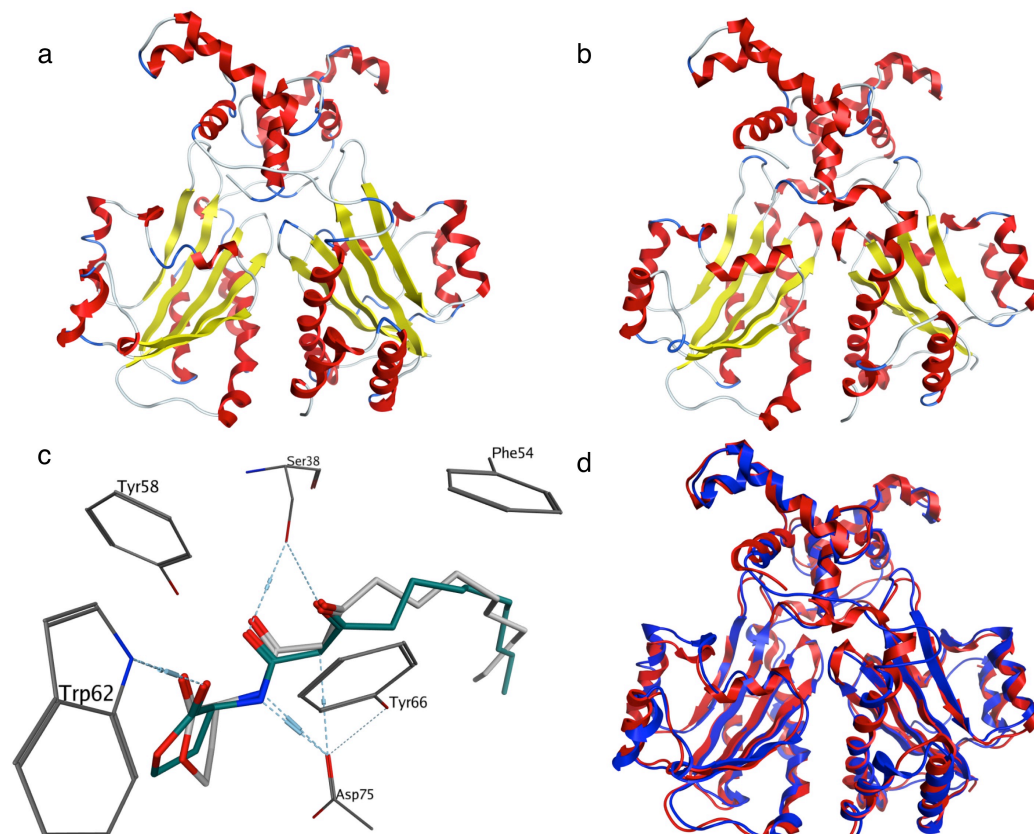

**Fig. S8: 3D Modelling of PauR.** Tertiary structure of the modeled PauR dimer from *Photorhabdus asymbiotica* (a). For the calculation of the PauR structure the tertiary structure of QscR (PDB ID: 3SZT) from *Pseudomonas aeruginosa* (b) was used as a template. To determine the quality of the docking procedure the co-crystallized QscR of *Pseudomonas aeruginosa* ligand (*N*-3-oxo-dodecanoyl-L-homoserine lactone) and the docked ligand (cyan) were superposed (c). The superposition (d) of PauR (blue) and QscR (red) revealed a root-mean-square deviation (RMSD) of 1.5 Å.

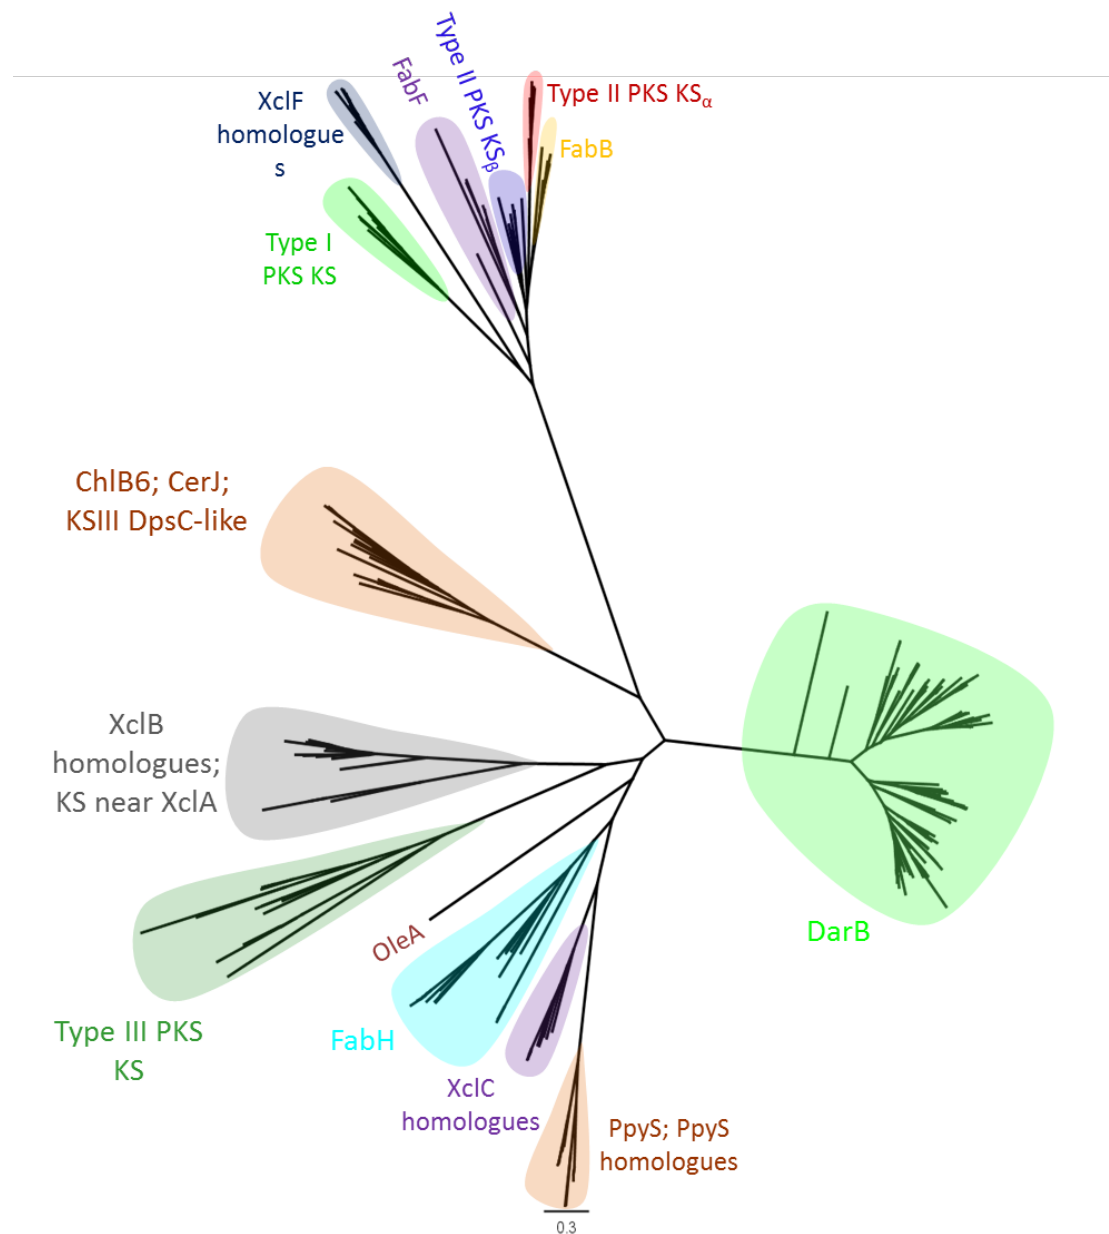

**Fig. S9: Phylogenetic tree (PHYML) comprising different ketosynthases.** KS sequences are listed in SI Appendix, Table S5 and a zoomed version of the DarB branch is shown for clarity in SI Appendix, Fig. S10. The scale bar indicates the degree of divergence as substitutions per sequence position.

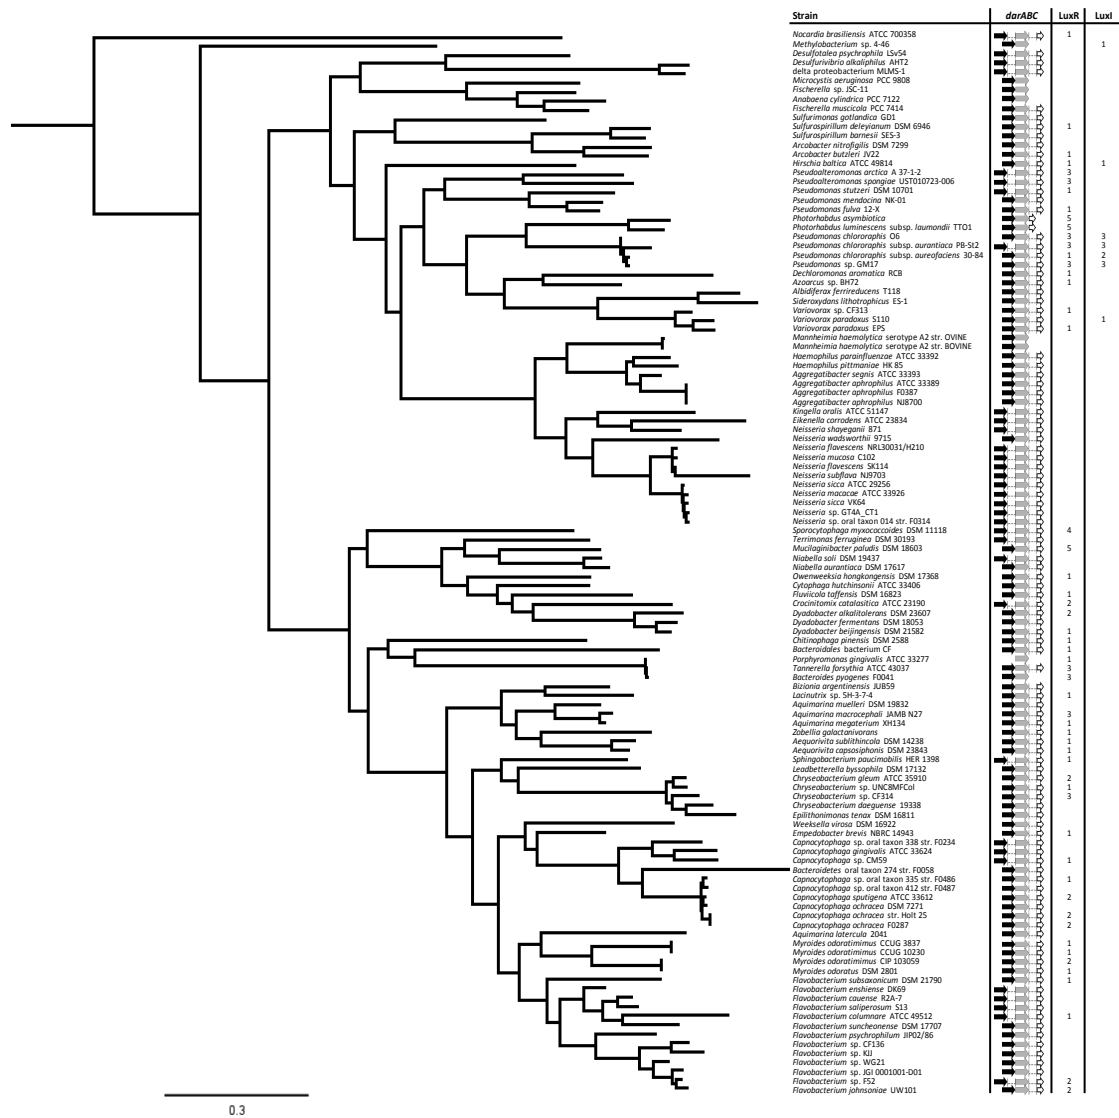

**Fig. S10:** Detailed phylogeny of *darB* (SI Appendix, Fig. S9), the corresponding arrangement of *darABC* in these genomes as well as the number of *luxR* and *luxI* genes identified are shown. A black arrow indicates *darA*, a grey arrow *darB* and a white arrow with a black frame *darC*. All identification numbers of identified genes are listed in SI Appendix, Table S7.



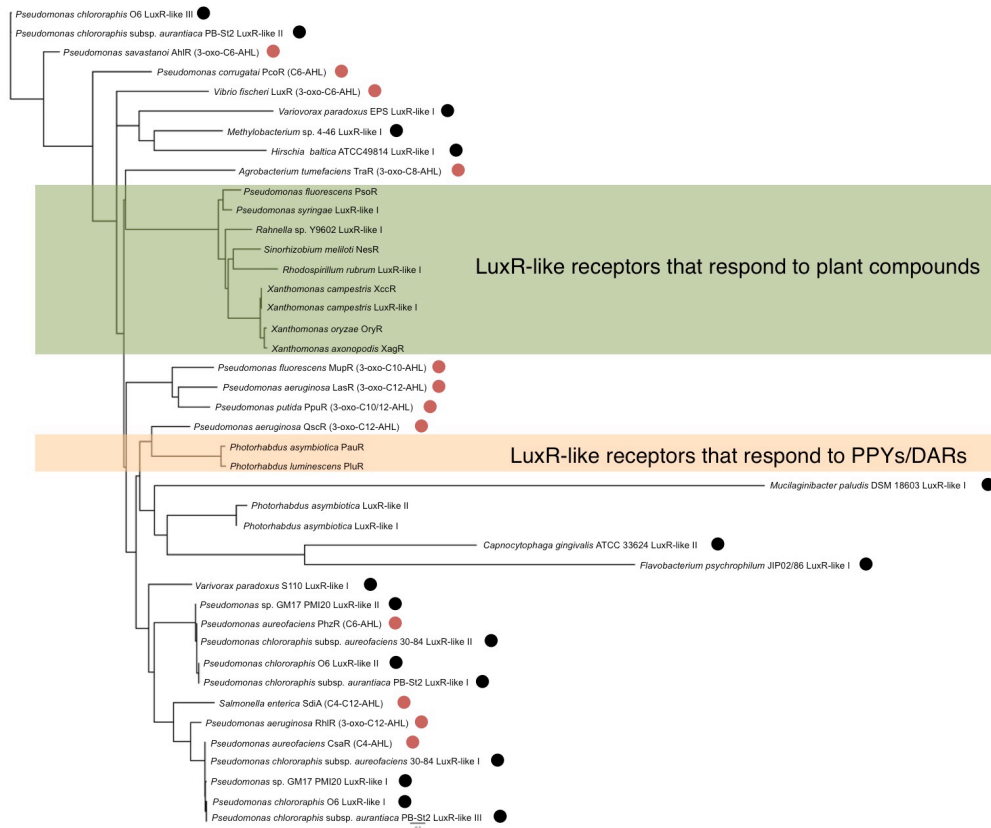

**Fig. S11: Phylogenetic tree (PHYML) comprising different LuxR-like proteins.** Red dots refer to known AHL-binding LuxR receptors (with the structure of the acyl side chain of their major AHL included in brackets). Black dots refer to LuxR sequences identified in DarB-containing genomes (which were also used for the generation of the KS phylogeny in SI Appendix, Fig. S9). LuxR-like proteins from plant associated bacteria (PAB) have been proposed to detect signals from plants (21). A list of all proteins and their accession numbers is provided in SI Appendix, Table S6. The scale bar indicates the degree of divergence as substitutions per sequence position.

## REFERENCES

1. Sambrook J, Fritsch EF, Maniatis T (1989) *Molecular Cloning: A Laboratory Manual* (Cold Spring Harbor Laboratory Pr). 2nd Ed.
2. Sarker MR, Cornelis GR (1997) An improved version of suicide vector pKNG101 for gene replacement in gram-negative bacteria. *Mol Microbiol* 23:410–411.
3. Münch A, Stingl L, Jung K, Heermann R (2008) *Photorhabdus luminescens* genes induced upon insect infection. *BMC Genomics* 9:229.
4. Guzman LML, Belin DD, Carson MJM, Beckwith JJ (1995) Tight regulation, modulation, and high-level expression by vectors containing the arabinose P<sub>BAD</sub> promoter. *J Bacteriol* 177:4121–4130.
5. Gödeke J, Heun M, Bubendorfer S, Paul K, Thormann KM (2011) Roles of Two *Shewanella oneidensis* MR-1 Extracellular Endonucleases. *App Env Microbiol* 77:5342–5351.
6. Heermann R, Zeppenfeld T, Jung K (2008) Simple generation of site-directed point mutations in the *Escherichia coli* chromosome using Red®/ET® Recombination. *Microb Cell Fact* 7:14.
7. Herrero M, de Lorenzo V, Timmis KN (1990) Transposon vectors containing non-antibiotic resistance selection markers for cloning and stable chromosomal insertion of foreign genes in gram-negative bacteria. *J Bacteriol* 172:6557–6567.
8. Fried L, Lassak J, Jung K (2012) A comprehensive toolbox for the rapid construction of *lacZ* fusion reporters. *J Microbiol Methods* 91:537–543.
9. Thanwisai A et al. (2012) Diversity of *Xenorhabdus* and *Photorhabdus* spp. and Their Symbiotic Entomopathogenic Nematodes from Thailand. *PLoS ONE* 7:e43835.
10. Reimer D, Pos KM, Thines M, Grün P, Bode HB (2011) A natural prodrug activation mechanism in nonribosomal peptide synthesis. *Nat Chem Biol* 7:888–890.
11. Guindon S, Gascuel O (2003) A simple, fast, and accurate algorithm to estimate large phylogenies by maximum likelihood. *Syst Biol* 52:696–704.
12. Larkin MA et al. (2007) Clustal W and Clustal X version 2.0. *Bioinformatics* 23:2947–2948.
13. Wilkinson P et al. (2009) Comparative genomics of the emerging human pathogen *Photorhabdus asymbiotica* with the insect pathogen *Photorhabdus luminescens*. *BMC Genomics* 10:302.
14. Thoma S, Schobert M (2009) An improved *Escherichia coli* donor strain for diparental mating. *FEMS Microbiol Lett* 294:127–132.

15. Yanisch-Perron C, Vieira J, Messing J (1985) Improved M13 phage cloning vectors and host strains: nucleotide sequences of the M13mp18 and pUC19 vectors. *Gene* 33:103–119.
16. Studier FW, Moffatt BA (1986) Use of bacteriophage T7 RNA polymerase to direct selective high-level expression of cloned genes. *J Mol Biol* 189:113–130.
17. Fuchs SW et al. (2013) Formation of 1,3-cyclohexanediones and resorcinols catalyzed by a widely occurring ketosynthase. *Angew Chem Int Ed* 52:4108–4112.
18. Brachmann AO et al. (2013) Pyrones as bacterial signaling molecules. *Nat Chem Biol* 9:573–578.
19. Lassak J, Henche A-L, Binnenkade L, Thormann KM (2010) ArcS, the cognate sensor kinase in an atypical Arc system of *Shewanella oneidensis* MR-1. *App Env Microbiol* 76:3263–3274.
20. A two-step sulfation in antibiotic biosynthesis requires a type III polyketide synthase. (2013) A two-step sulfation in antibiotic biosynthesis requires a type III polyketide synthase. 9:610–5.
21. González JE, Venturi V (2013) A novel widespread interkingdom signaling circuit. *Trends Plant Sci* 18:167–174.
